# Supplementary material for: Crannenols A–D, Sesquiterpenoids from the Irish Deep-Sea Soft Coral Acanella arbuscula
Source: PubMed Central journal article supplement (PMC9623587; doi:10.1021/acs.jnatprod.2c00602), 2022-09-19
Supplement: np2c00602_si_001.pdf [file np2c00602_si_001.pdf]

Supplemental Information for:

# Crannenols A-D, Sesquiterpenoids from the Irish Deep-Sea Soft Coral *Acanella arbuscula*

Joshua T. Welsch,<sup>†</sup> Ryan M. Young,<sup>‡</sup> A. Louise Allcock,<sup>‡</sup> Mark P. Johnson,<sup>‡</sup> Bill J. Baker<sup>†</sup>

<sup>†</sup>Department of Chemistry, University of South Florida, Tampa, FL, USA.

<sup>‡</sup>School of Natural Sciences and Ryan Institute, University of Galway, University Road, Galway,

H91 TK33, Ireland

|                                                                                                  | Page |
|--------------------------------------------------------------------------------------------------|------|
| Figure S1: Crannenol A (1) <sup>1</sup> H NMR spectrum (600 MHz, CDCl <sub>3</sub> ).            | 2    |
| Figure S2: Crannenol A (1) <sup>13</sup> C NMR spectrum (150 MHz, CDCl <sub>3</sub> ).           | 3    |
| Figure S3: Crannenol A (1) HSQC NMR spectrum (500 MHz, CDCl <sub>3</sub> ).                      | 3    |
| Figure S4: Crannenol A (1) HMBC NMR spectrum (600 MHz, CDCl <sub>3</sub> ).                      | 4    |
| Figure S5: Crannenol A (1) COSY NMR spectrum (600 MHz, CDCl <sub>3</sub> ).                      | 4    |
| Figure S6: Crannenol A (1) NOESY NMR spectrum (600 MHz, CDCl <sub>3</sub> ).                     | 5    |
| Figure S7: Crannenol A (1) HREIMS.                                                               | 5    |
| Figure S8: Crannenol A (1) UV $\lambda_{\max}$ (CH <sub>3</sub> OH).                             | 6    |
| Figure S9: Crannenol A (1) IR spectrum (thin film).                                              | 6    |
| Figure S10: Crannenol B (2) <sup>1</sup> H NMR spectrum (600 MHz, CDCl <sub>3</sub> ).           | 7    |
| Figure S11: Crannenol B (2) <sup>13</sup> C NMR spectrum (150 MHz, CDCl <sub>3</sub> ).          | 7    |
| Figure S12: Crannenol B (2) <sup>13</sup> C NMR spectrum zoomed (150 MHz, CDCl <sub>3</sub> ).   | 8    |
| Figure S13: Crannenol B (2) DEPT135 NMR spectrum (600 MHz, CDCl <sub>3</sub> ).                  | 8    |
| Figure S14: Crannenol B (2) HSQC NMR spectrum (600 MHz, CDCl <sub>3</sub> ).                     | 9    |
| Figure S15: Crannenol B (2) HMBC NMR spectrum (500 MHz, CDCl <sub>3</sub> ).                     | 9    |
| Figure S16: Crannenol B (2) COSY NMR spectrum (600 MHz, CDCl <sub>3</sub> ).                     | 10   |
| Figure S17: Crannenol B (2) NOESY NMR spectrum (500 MHz, CDCl <sub>3</sub> ).                    | 10   |
| Figure S18: Crannenol B (2) 1D NOE irradiating protons at 4.58ppm (400 MHz, CDCl <sub>3</sub> ). | 11   |
| Figure S19: Crannenol B (2) 1D NOE irradiating protons at 1.75ppm (400 MHz, CDCl <sub>3</sub> ). | 11   |
| Figure S20: Crannenol B (2) HREIMS.                                                              | 12   |

|                                                                                         |    |
|-----------------------------------------------------------------------------------------|----|
| Figure S21: Crannenol B (2) UV $\lambda_{\max}$ (CH <sub>3</sub> OH).                   | 12 |
| Figure S22: Crannenol B (2) IR spectrum (thin film).                                    | 13 |
| Figure S23: Crannenol C (3) <sup>1</sup> H NMR spectrum (600 MHz, CDCl <sub>3</sub> ).  | 13 |
| Figure S24: Crannenol C (3) <sup>13</sup> C NMR spectrum (150 MHz, CDCl <sub>3</sub> ). | 14 |
| Figure S25: Crannenol C (3) HSCQ NMR spectrum (500 MHz, CDCl <sub>3</sub> ).            | 14 |
| Figure S26: Crannenol C (3) HMBC NMR spectrum (500 MHz, CDCl <sub>3</sub> ).            | 15 |
| Figure S27: Crannenol C (3) COSY NMR spectrum (500 MHz, CDCl <sub>3</sub> ).            | 15 |
| Figure S28: Crannenol C (3) NOESY NMR spectrum (500 MHz, CDCl <sub>3</sub> ).           | 16 |
| Figure S29: Crannenol C (3) HRESIMS.                                                    | 16 |
| Figure S30: Crannenol C (3) UV $\lambda_{\max}$ (CH <sub>3</sub> OH).                   | 17 |
| Figure S31: Crannenol C (3) IR spectrum (thin film).                                    | 17 |
| Figure S32: Crannenol D (4) <sup>1</sup> H NMR spectrum (600 MHz, CDCl <sub>3</sub> ).  | 18 |
| Figure S33: Crannenol D (4) <sup>13</sup> C NMR spectrum (150 MHz, CDCl <sub>3</sub> ). | 18 |
| Figure S34: Crannenol D (4) HSCQ NMR spectrum (500 MHz, CDCl <sub>3</sub> ).            | 19 |
| Figure S35: Crannenol D (4) HMBC NMR spectrum (500 MHz, CDCl <sub>3</sub> ).            | 19 |
| Figure S36: Crannenol D (4) COSY NMR spectrum (600 MHz, CDCl <sub>3</sub> ).            | 20 |
| Figure S37: Crannenol D (4) NOESY NMR spectrum (500 MHz, CDCl <sub>3</sub> ).           | 20 |
| Figure S38: Crannenol D (4) HRESIMS.                                                    | 21 |
| Figure S39: Crannenol D (4) UV $\lambda_{\max}$ (CH <sub>3</sub> OH).                   | 21 |
| Figure S40: Crannenol D (4) IR spectrum (thin film).                                    | 22 |

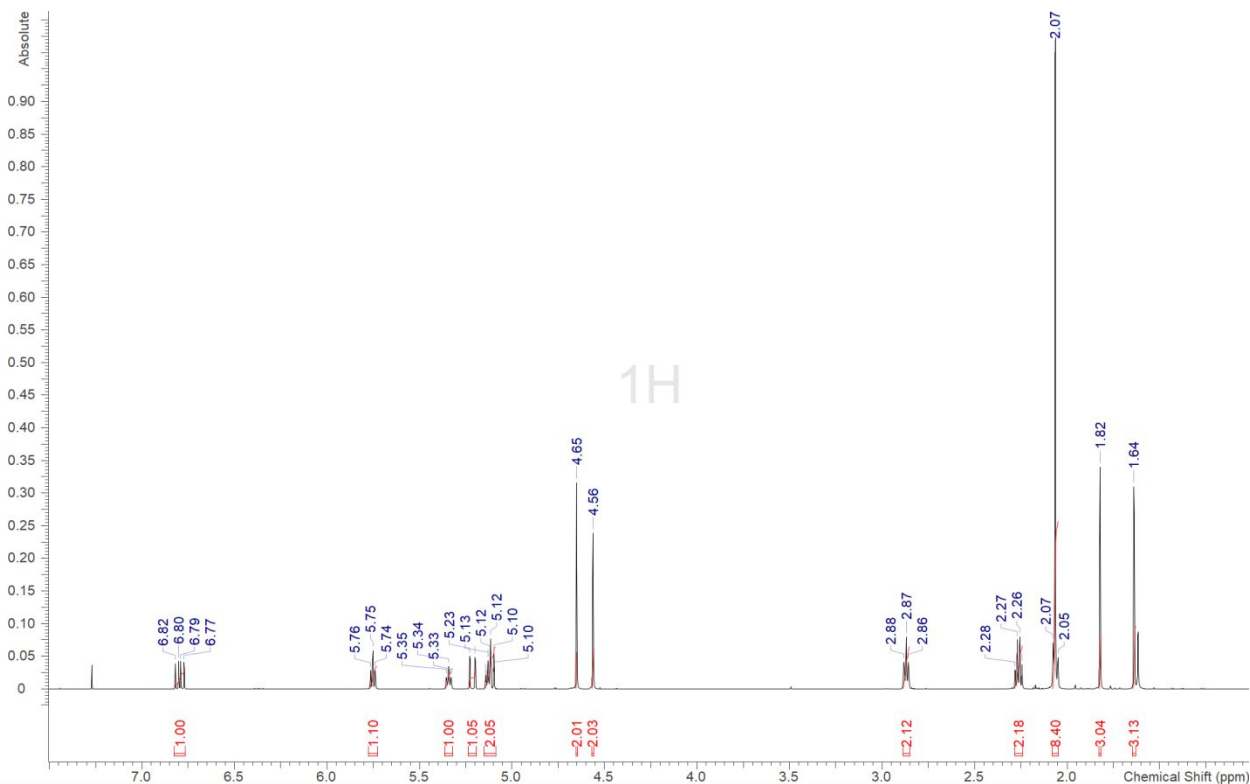

Figure S1: Crannenol A (1) <sup>1</sup>H NMR spectrum (600 MHz, CDCl<sub>3</sub>).

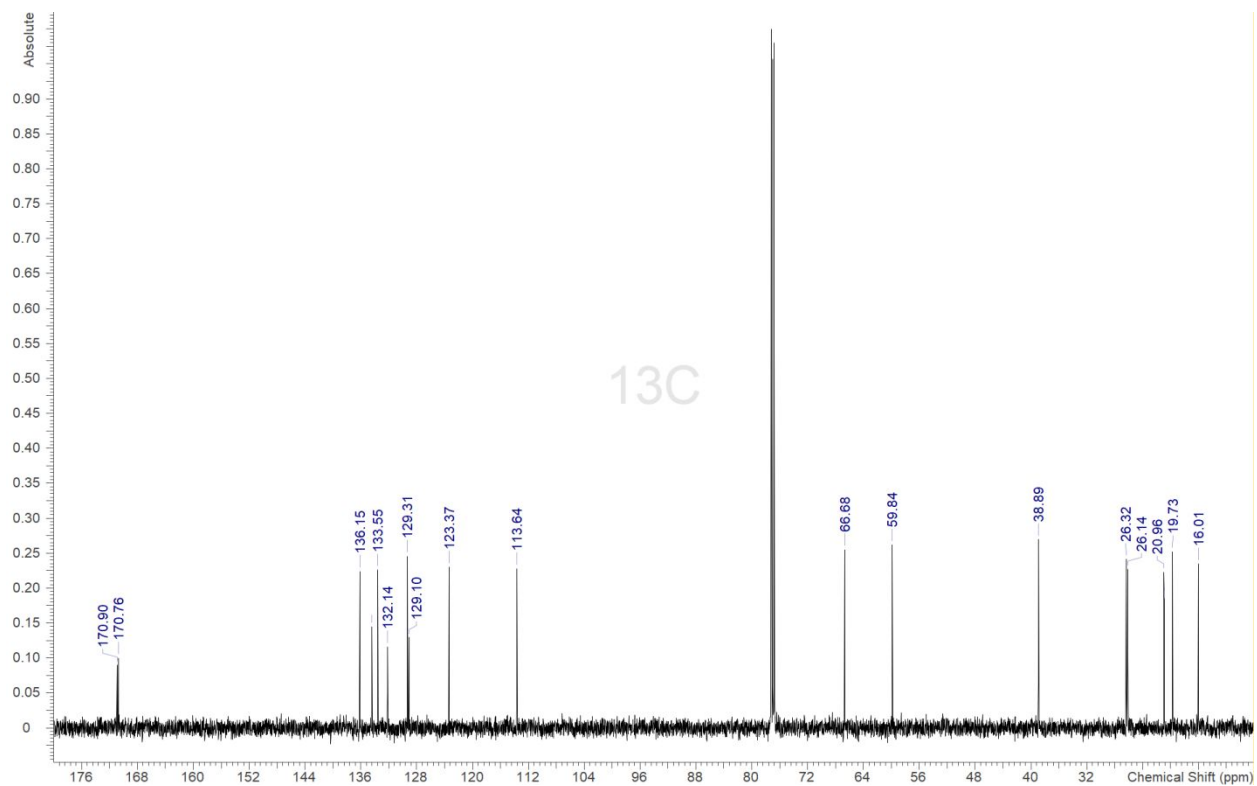

Figure S2: Crannenol A (**1**)  $^{13}\text{C}$  NMR spectrum (150 MHz,  $\text{CDCl}_3$ ).

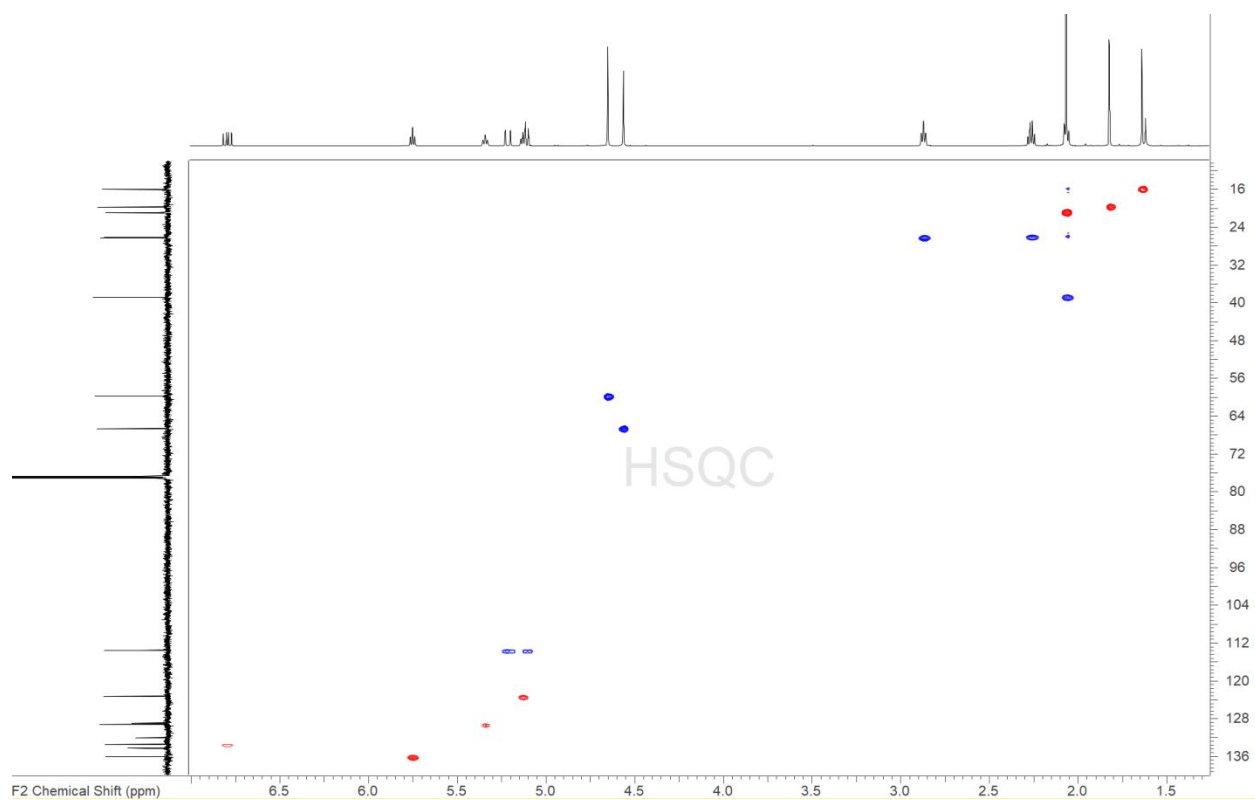

Figure S3: Crannenol A (**1**) HSQC spectrum (500 MHz,  $\text{CDCl}_3$ ).

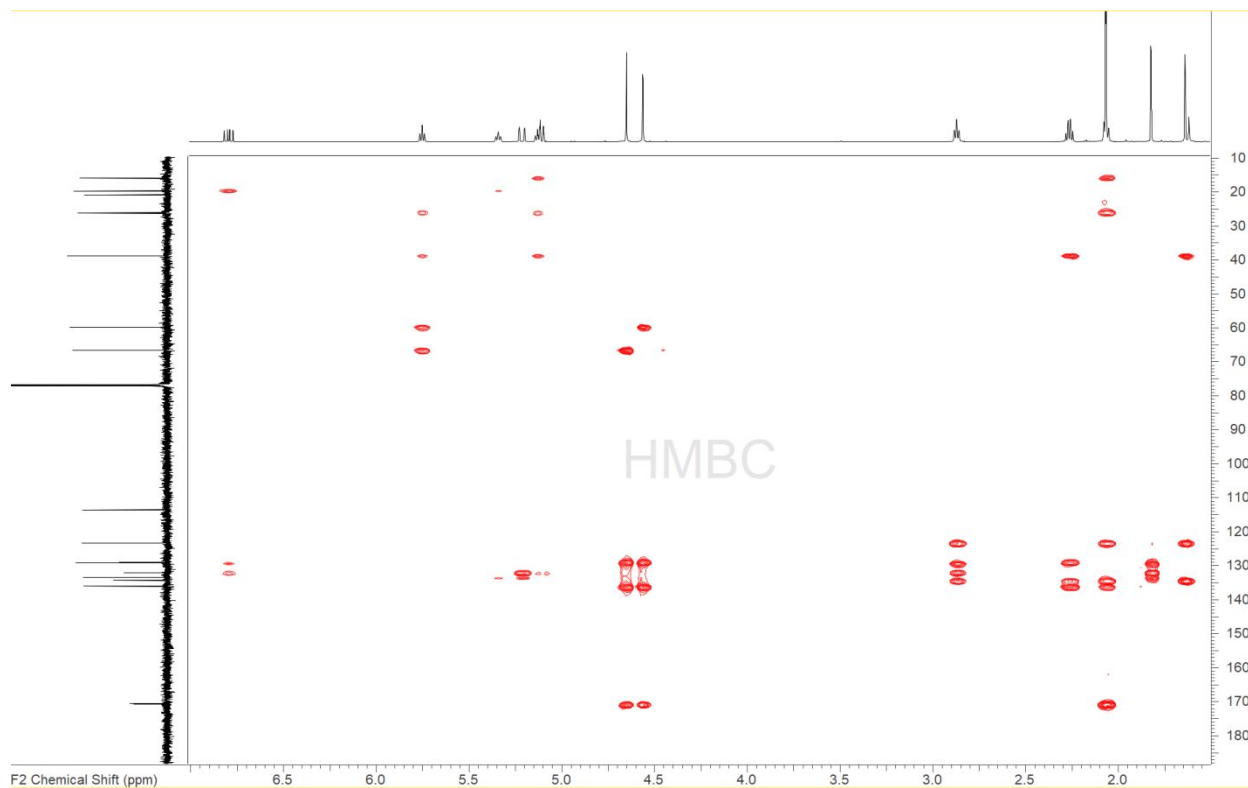

Figure S4: Crannenol A (1) HMBC spectrum (600 MHz, CDCl<sub>3</sub>).

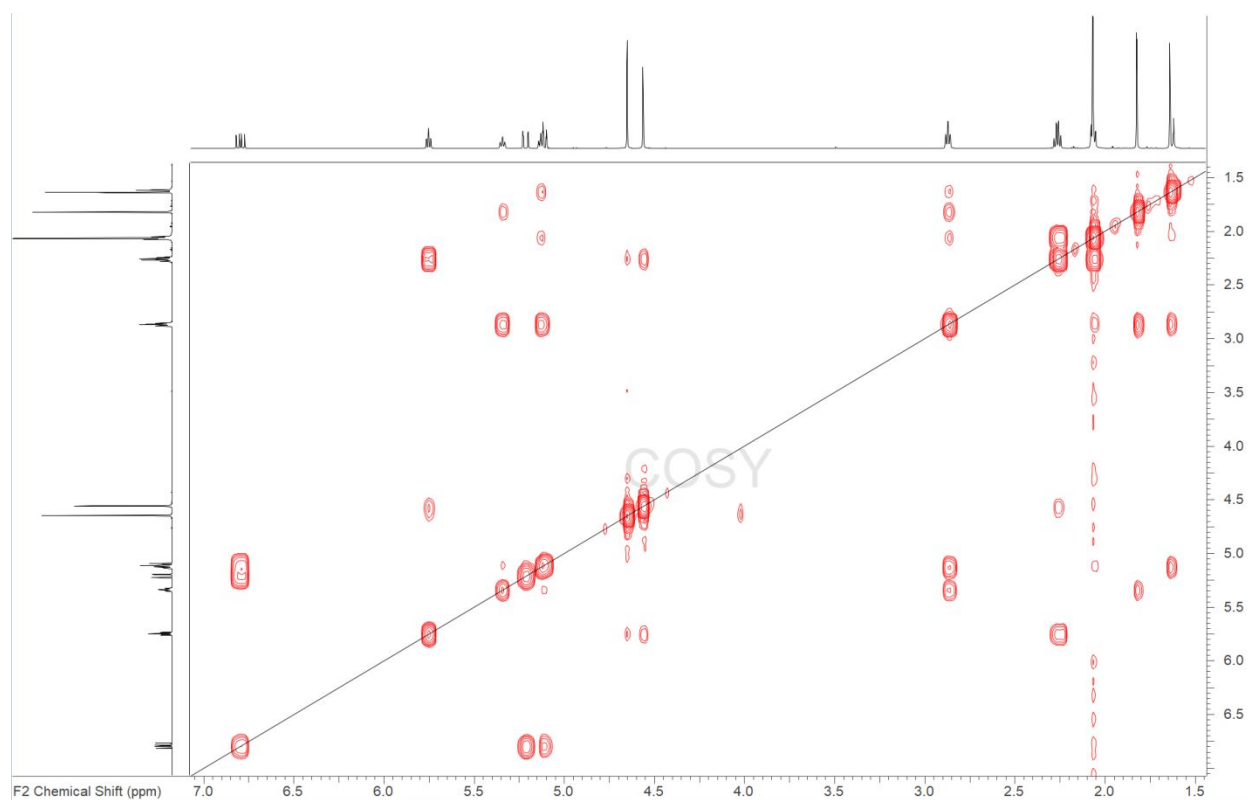

Figure S5: Crannenol A (1) COSY spectrum (600 MHz, CDCl<sub>3</sub>).

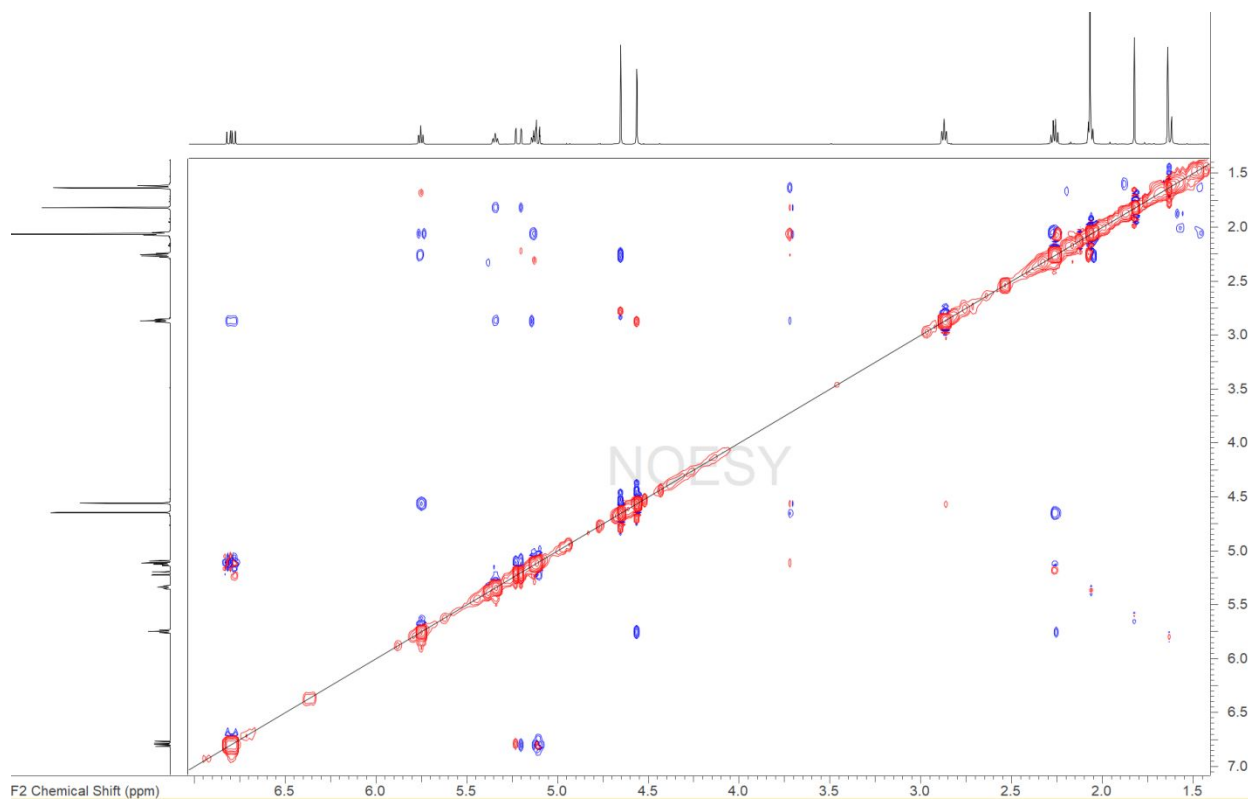

Figure S6: Crannenol A (**1**) NOESY spectrum (600 MHz, CDCl<sub>3</sub>).

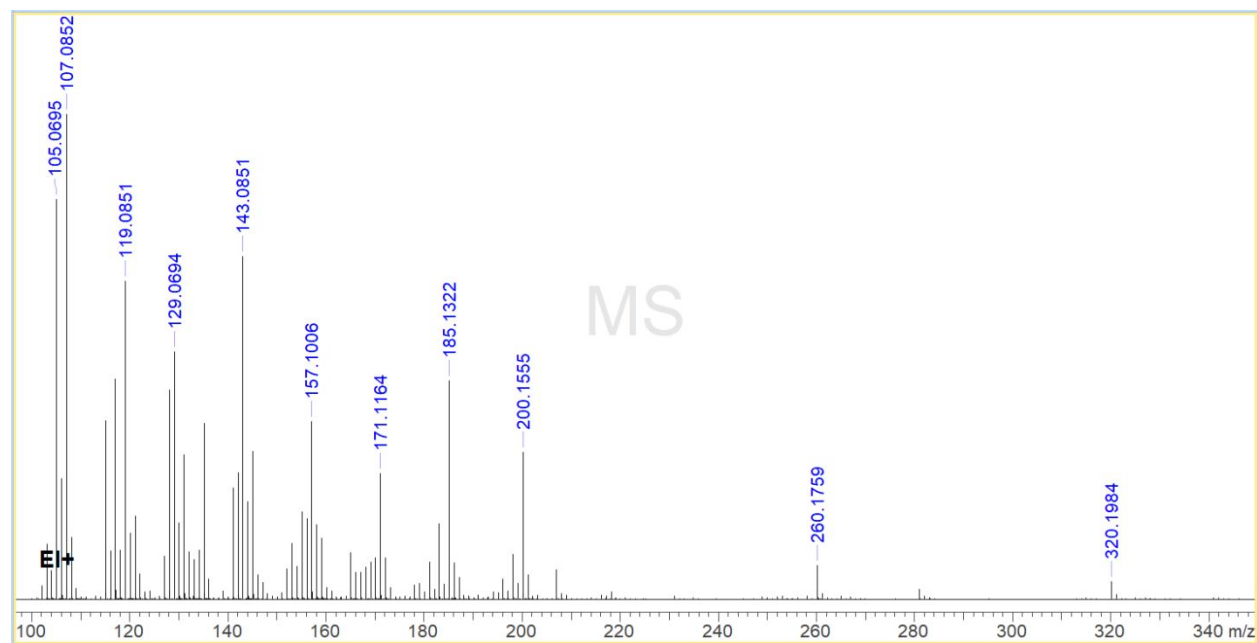

Figure S7: Crannenol A (**1**) HREIMS.

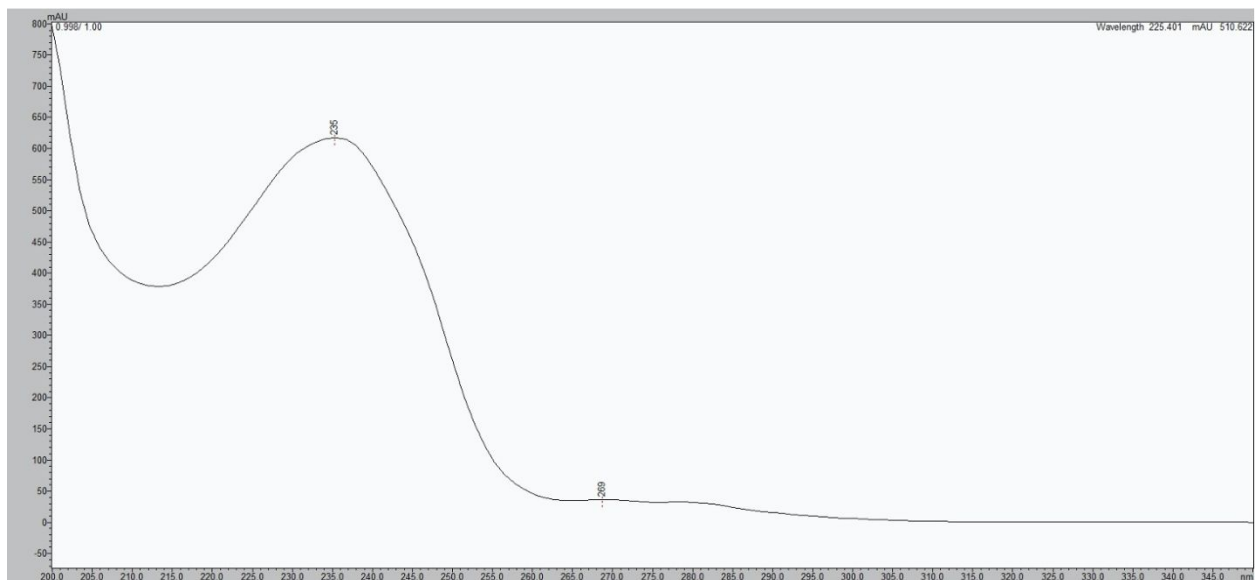

Figure S8: Crannenol A (**1**) UV  $\lambda_{\max}$  (CH<sub>3</sub>OH).

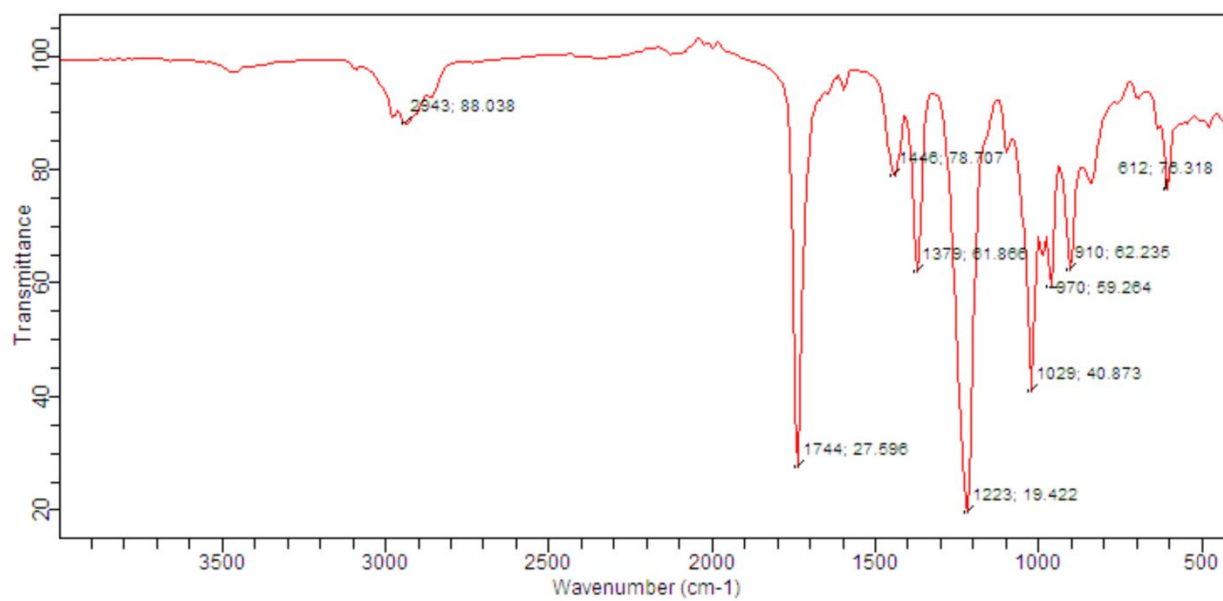

Figure S9: Crannenol A (**1**) IR spectrum (thin film).

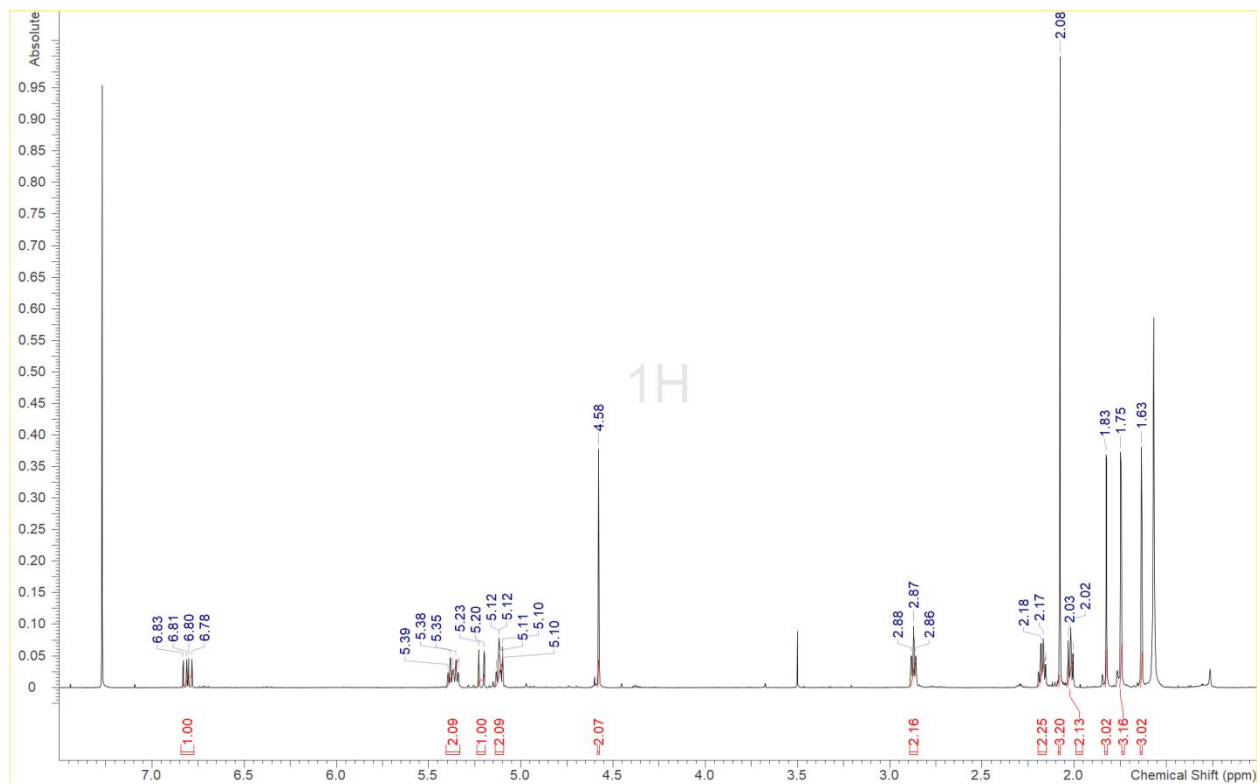

Figure S10: Crannenol B (**2**) <sup>1</sup>H NMR spectrum (600 MHz, CDCl<sub>3</sub>).

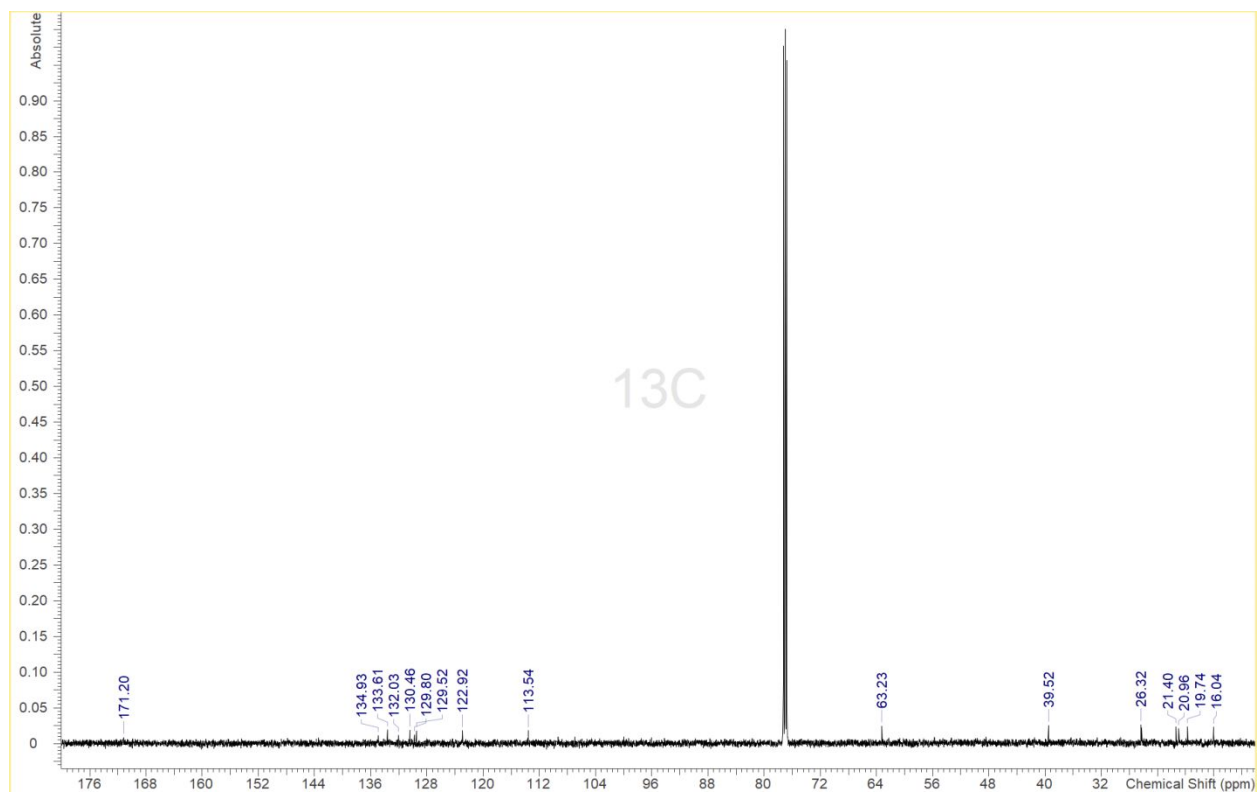

Figure S11: Crannenol B (**2**) <sup>13</sup>C NMR spectrum (150 MHz, CDCl<sub>3</sub>).

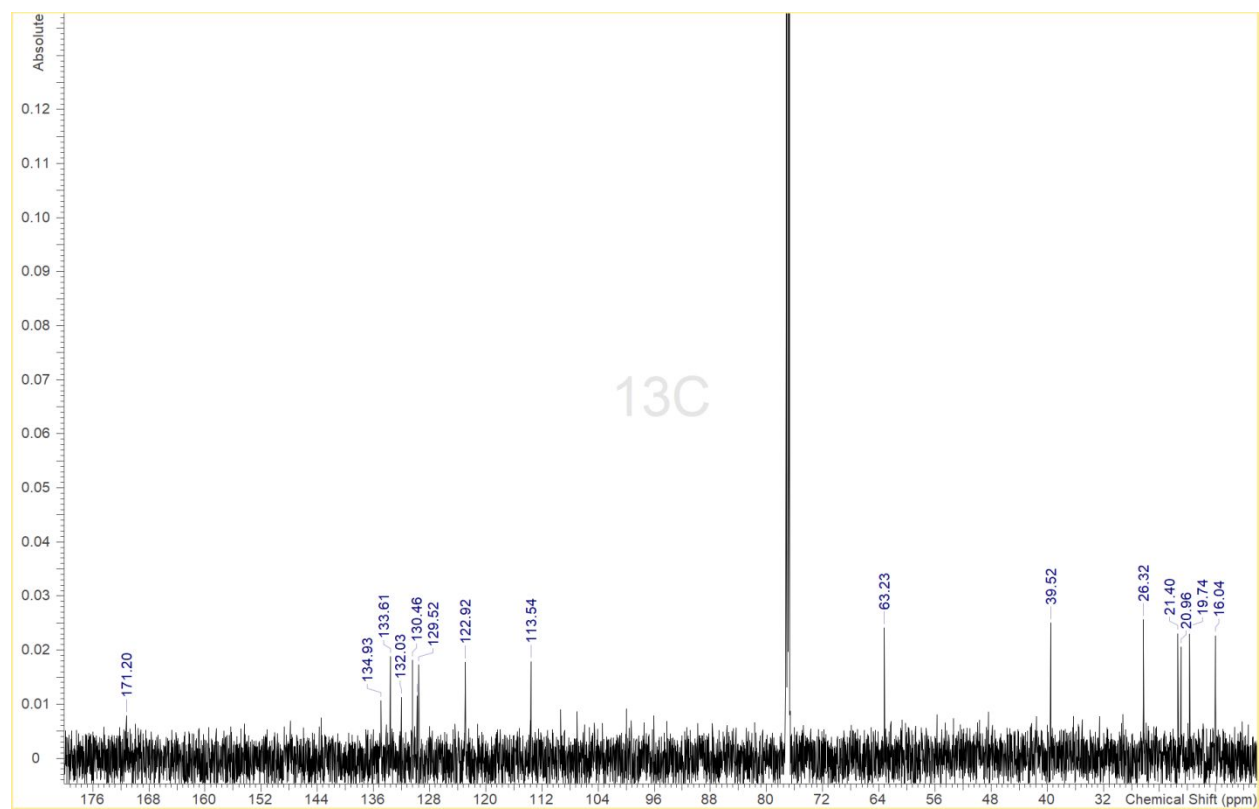

Figure S12: Crannenol B (**2**)  $^{13}\text{C}$  NMR spectrum zoomed (150 MHz,  $\text{CDCl}_3$ ).

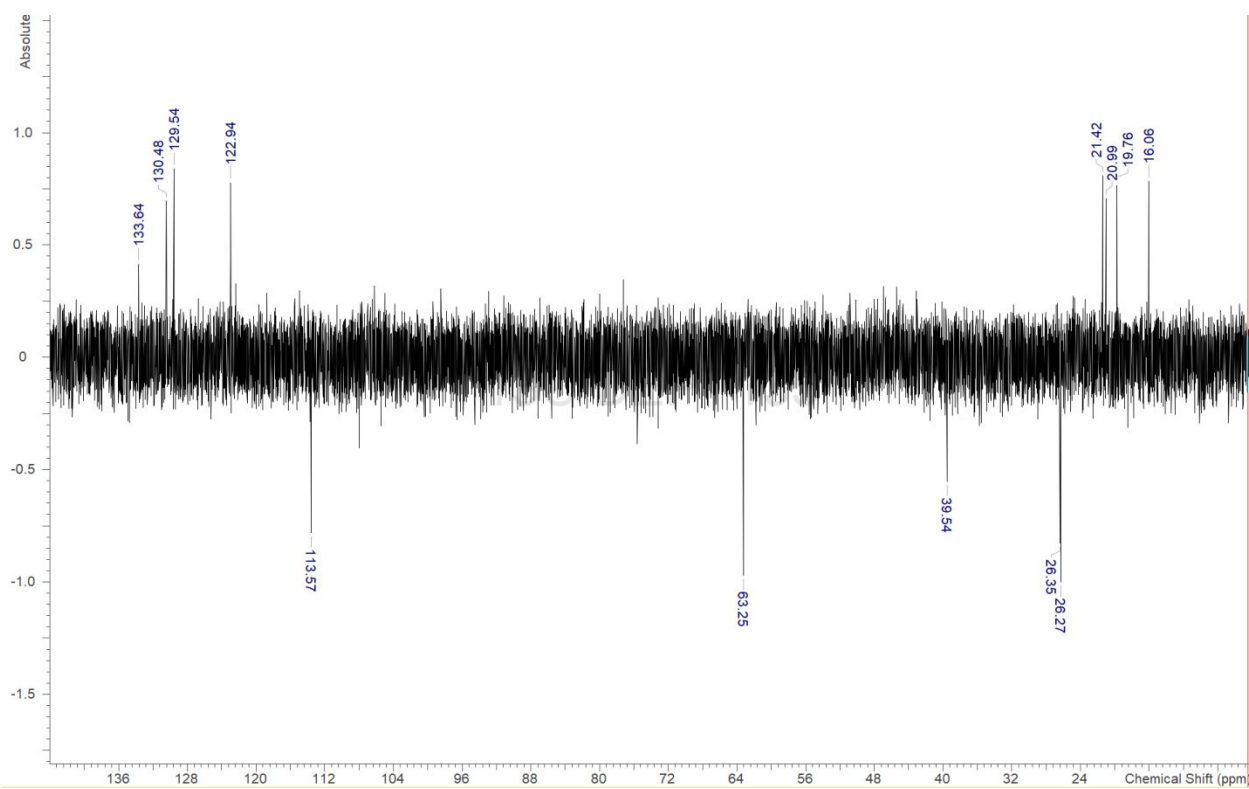

Figure S13: Crannenol B (**2**) DEPT135 NMR spectrum (150 MHz,  $\text{CDCl}_3$ ).



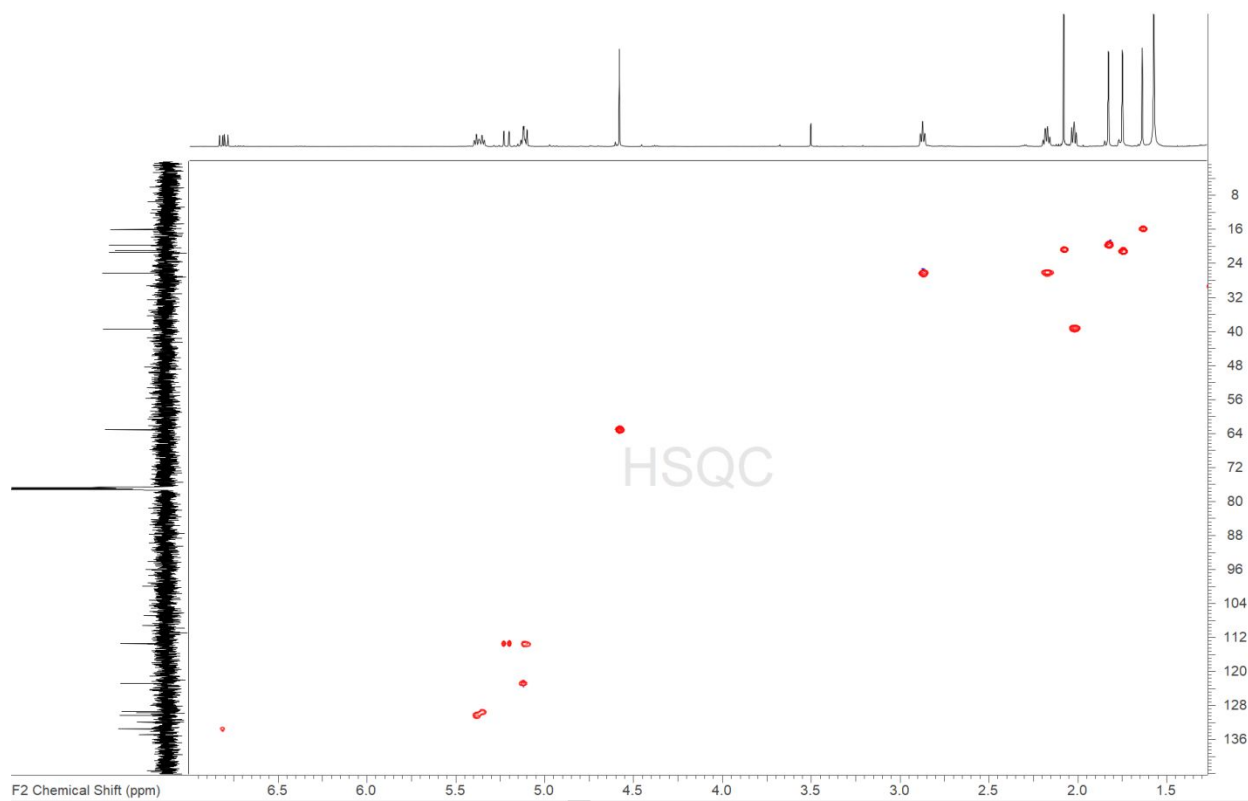

Figure S14: Crannenol B (**2**) HSQC NMR spectrum (600 MHz, CDCl<sub>3</sub>).

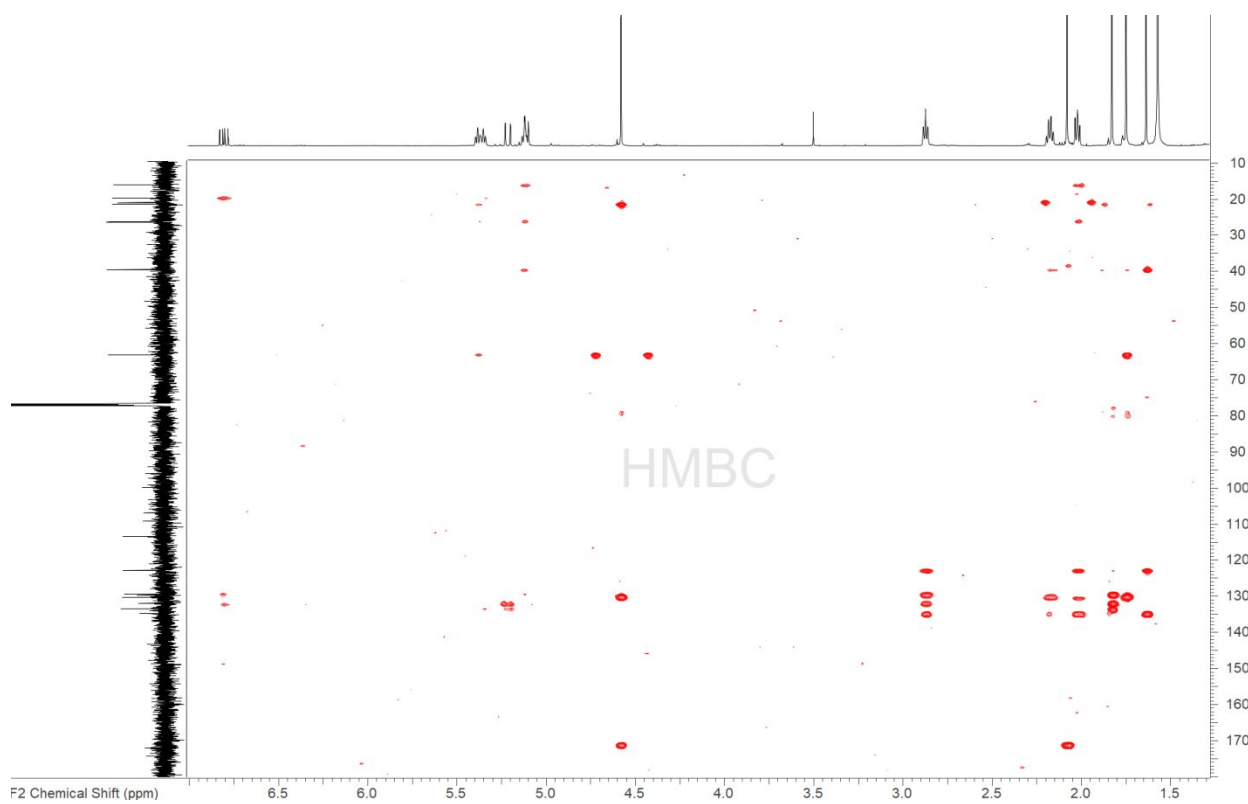

Figure S15: Crannenol B (**2**) HMBC NMR spectrum (500 MHz, CDCl<sub>3</sub>).

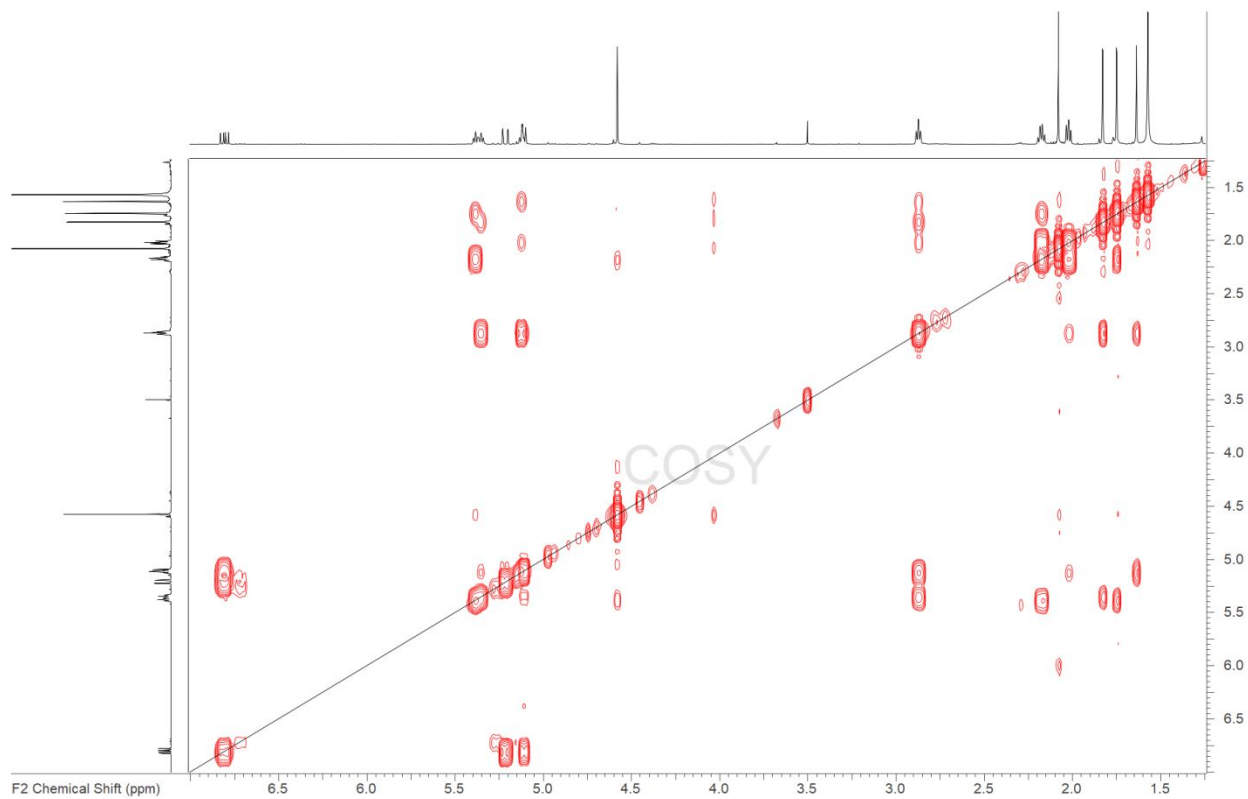

Figure S16: Crannenol B (**2**) COSY NMR spectrum (600 MHz,  $\text{CDCl}_3$ ).

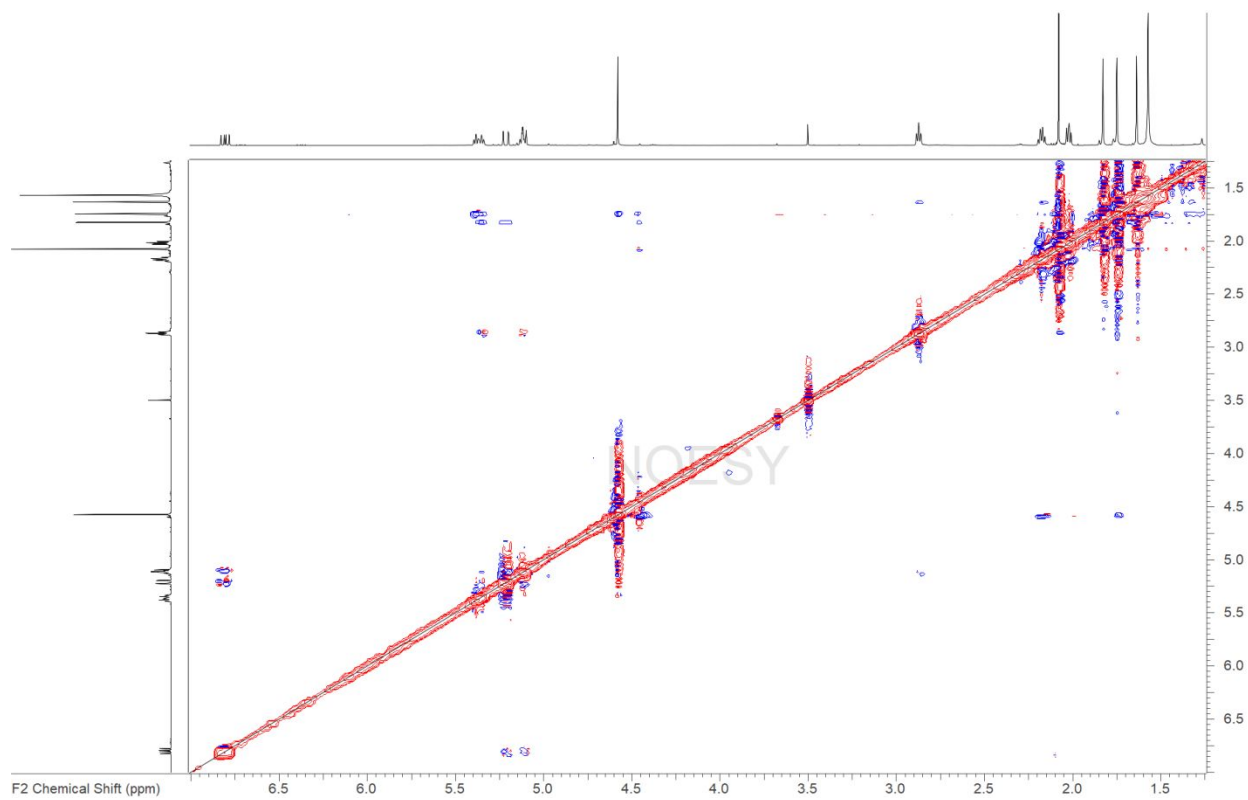

Figure S17: Crannenol B (**2**) NOESY NMR spectrum (500 MHz,  $\text{CDCl}_3$ ).

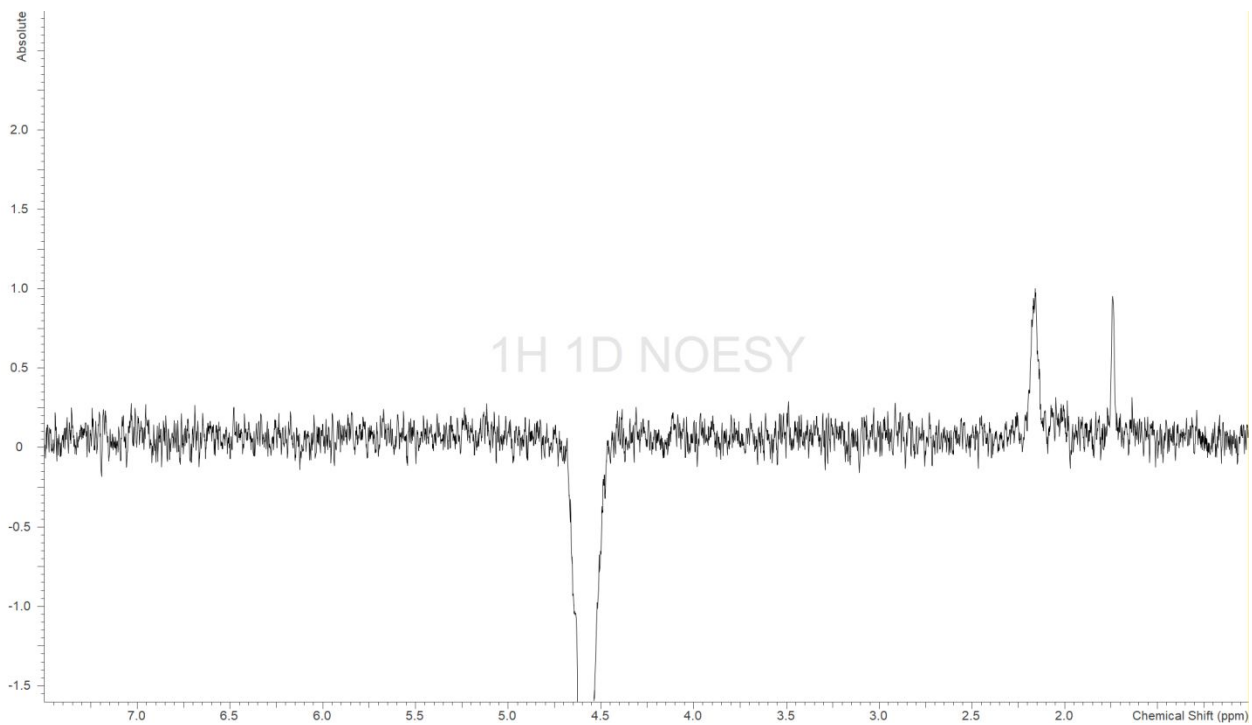

Figure S18: Crannenol B (**2**) 1D NOE NMR spectrum irradiating protons at 4.58ppm (400 MHz, CDCl<sub>3</sub>).

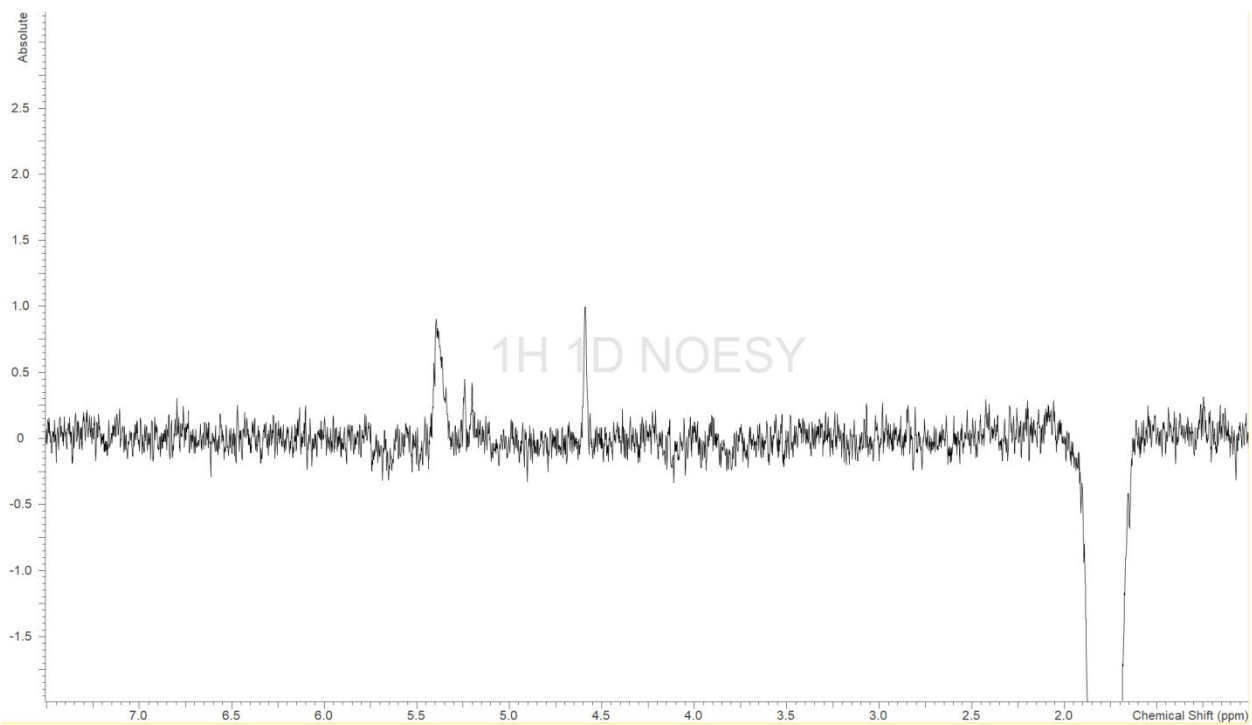

Figure S19: Crannenol B (**2**) 1D NOE NMR spectrum irradiating protons at 1.75ppm (400 MHz, CDCl<sub>3</sub>).

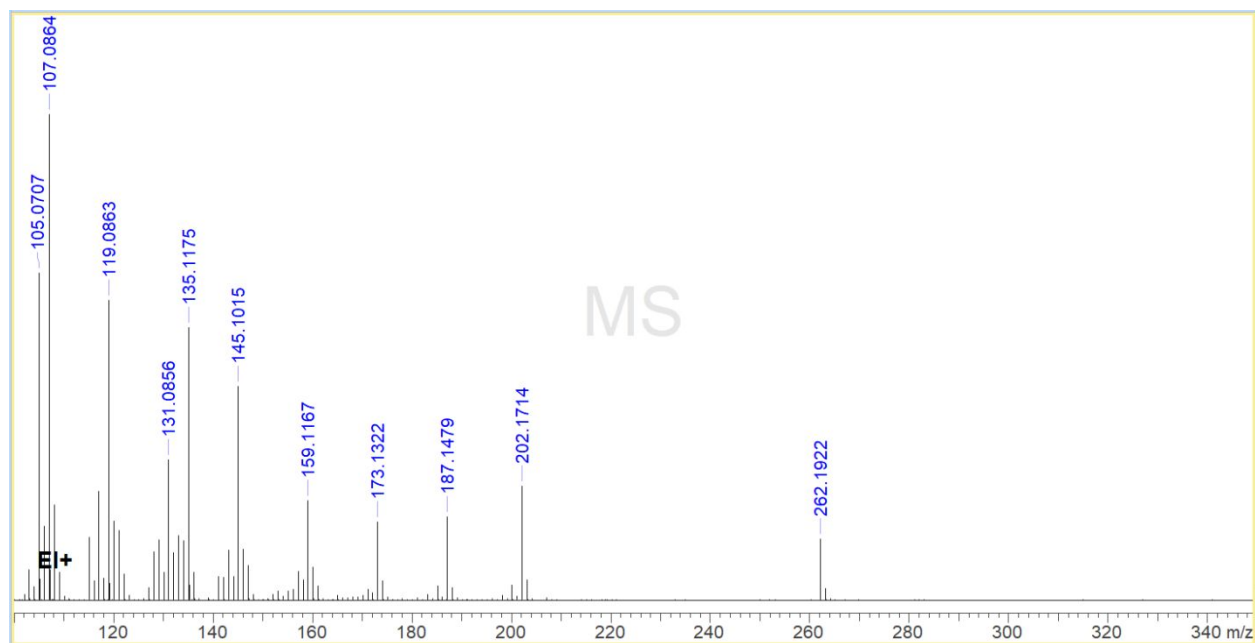

Figure S20: Crannenol B (**2**) HREIMS.

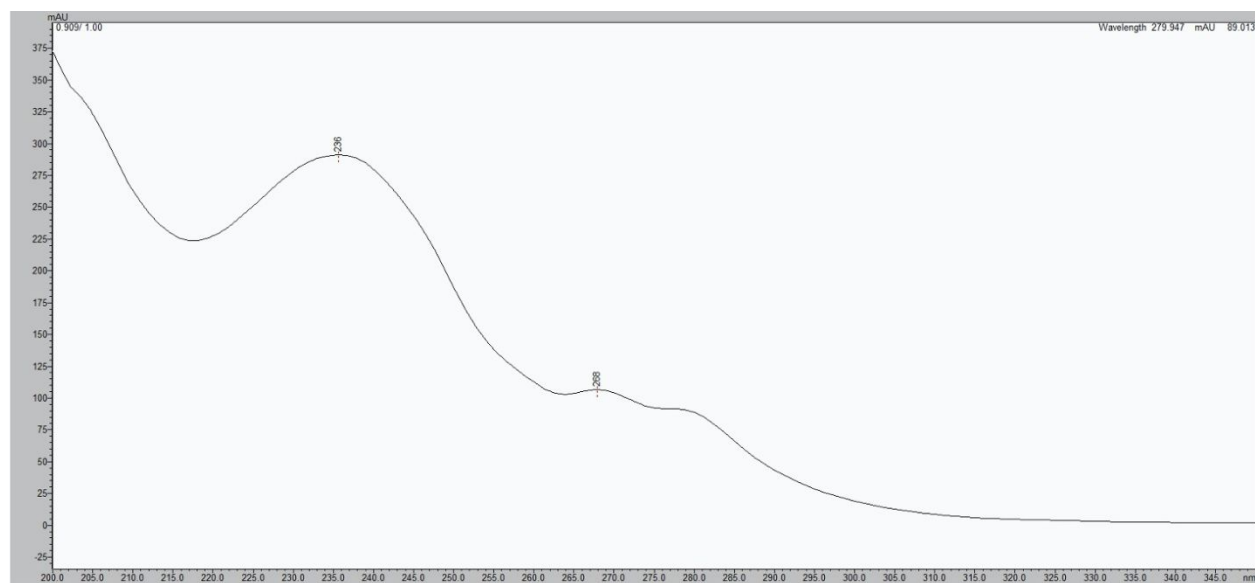

Figure S21: Crannenol B (**2**) UV  $\lambda_{\max}$  (CH<sub>3</sub>OH).

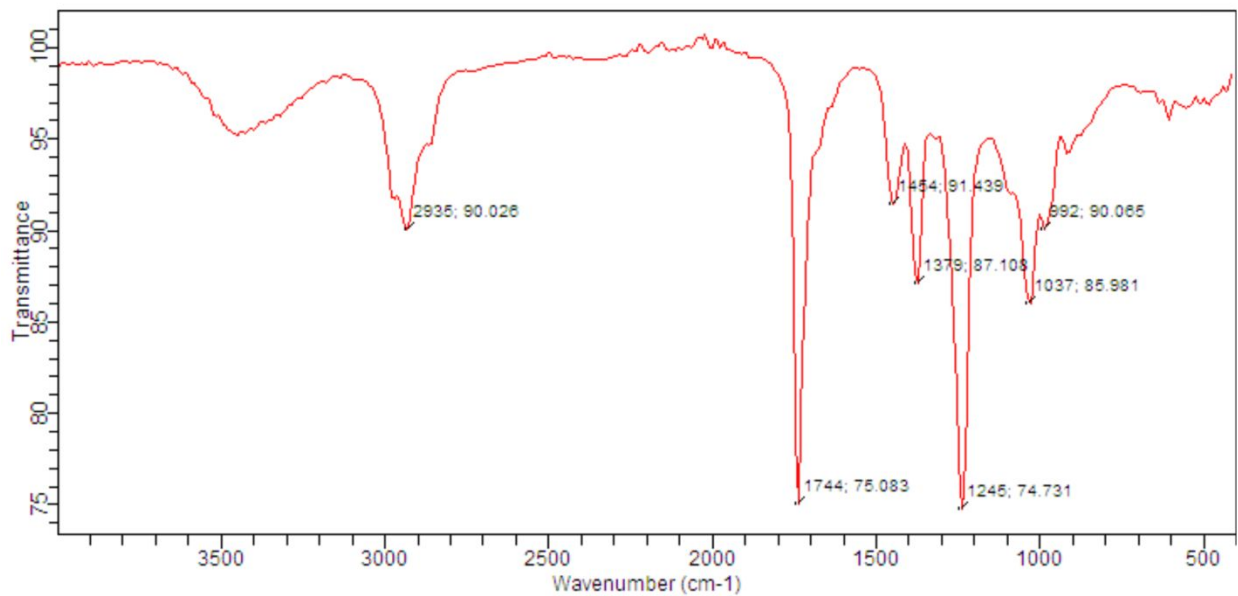

Figure S22: Crannol B (**2**) IR spectrum (thin film).

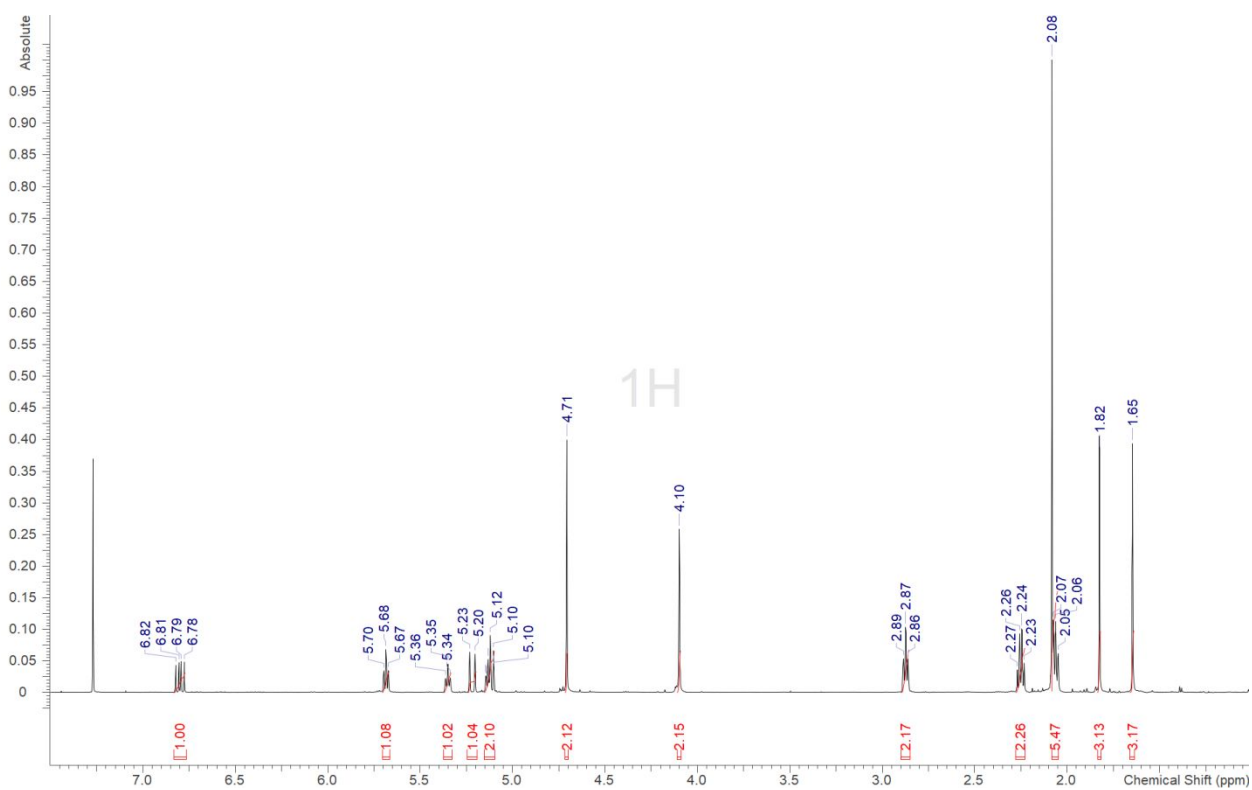

Figure S23: Crannol C (**3**) <sup>1</sup>H NMR spectrum (600 MHz, CDCl<sub>3</sub>).

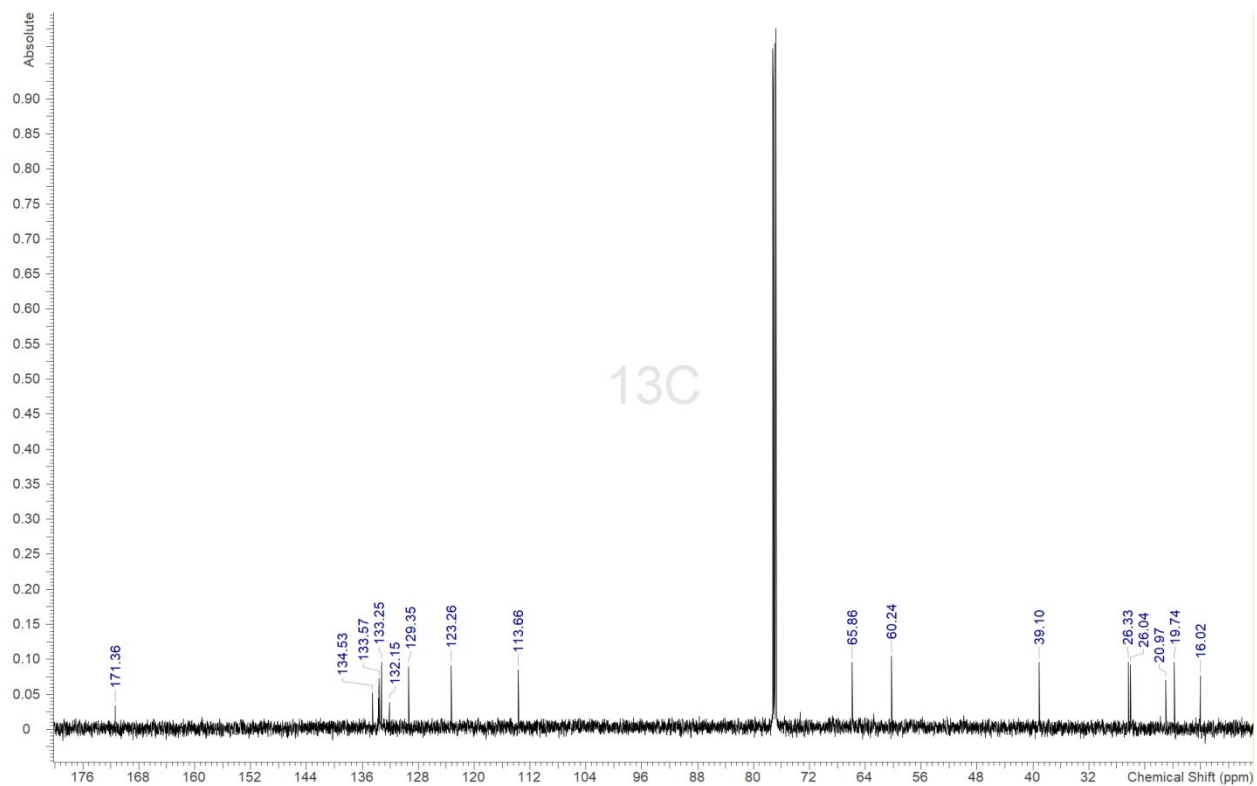

Figure S24: Crannenol C (**3**)  $^{13}\text{C}$  NMR spectrum (150 MHz,  $\text{CDCl}_3$ ).

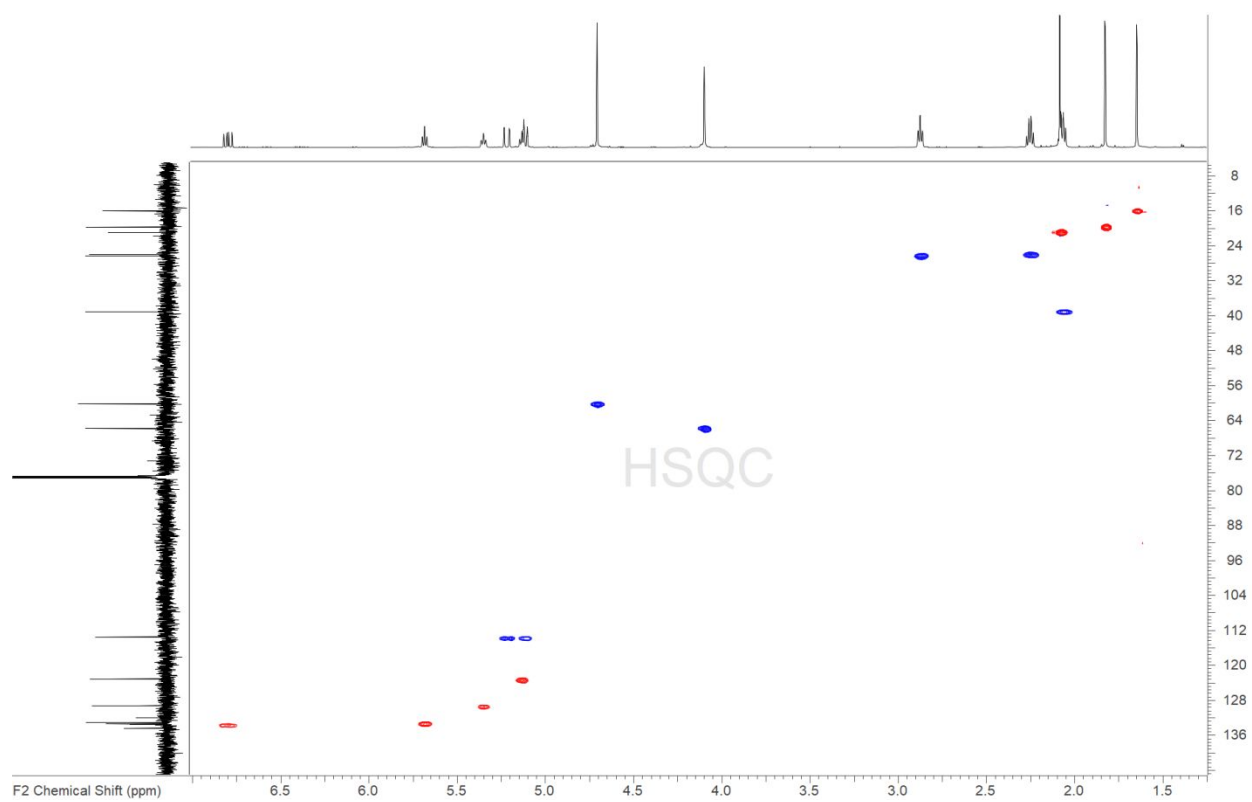

Figure S25: Crannenol C (**3**) HSQC NMR (500 MHz,  $\text{CDCl}_3$ ).

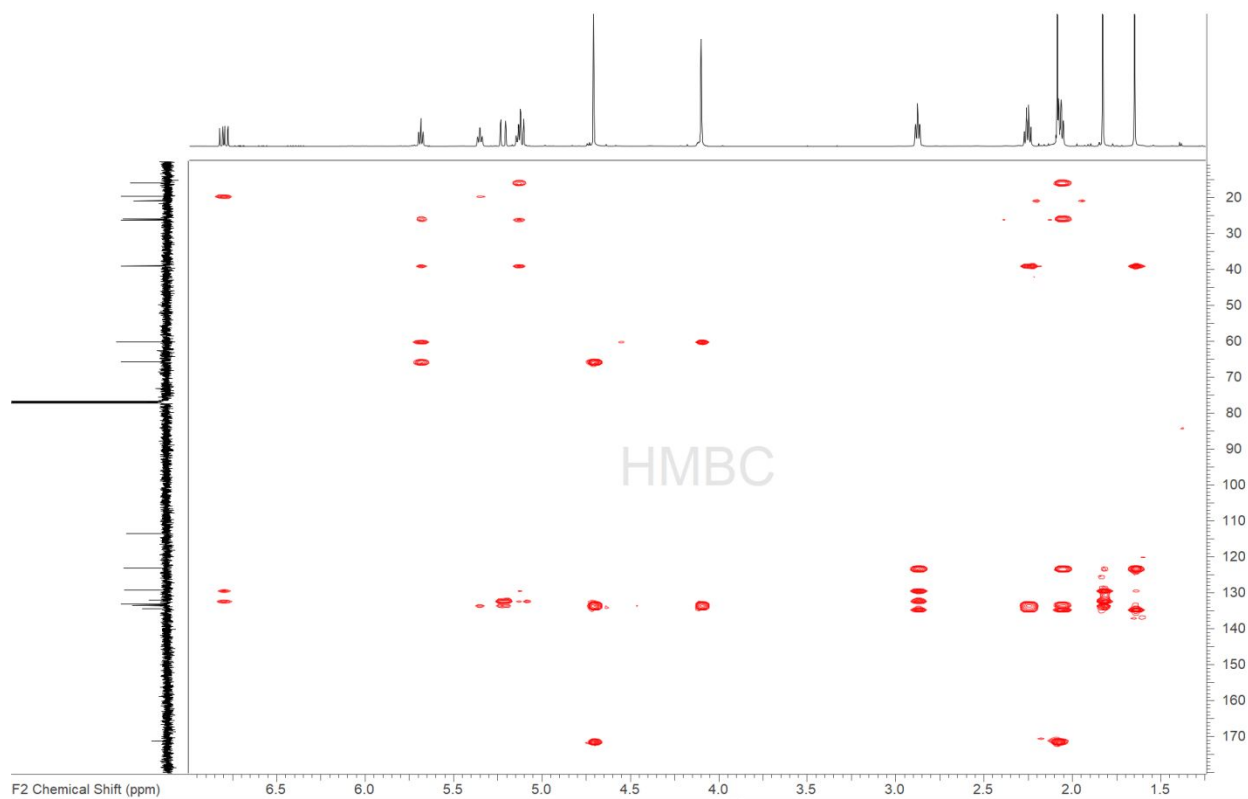

Figure S26: Crannenol C (**3**) HMBC NMR (500 MHz, CDCl<sub>3</sub>).

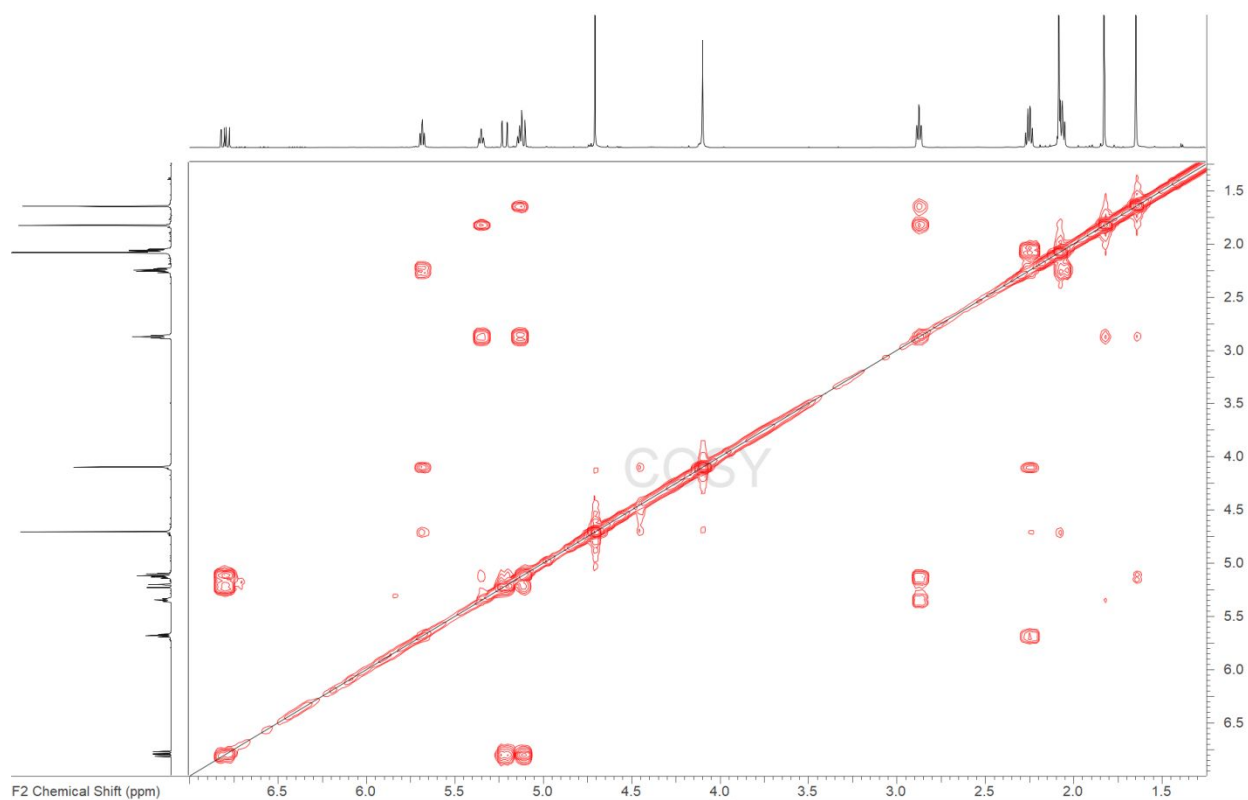

Figure S27: Crannenol C (**3**) COSY NMR spectrum (500 MHz, CDCl<sub>3</sub>).

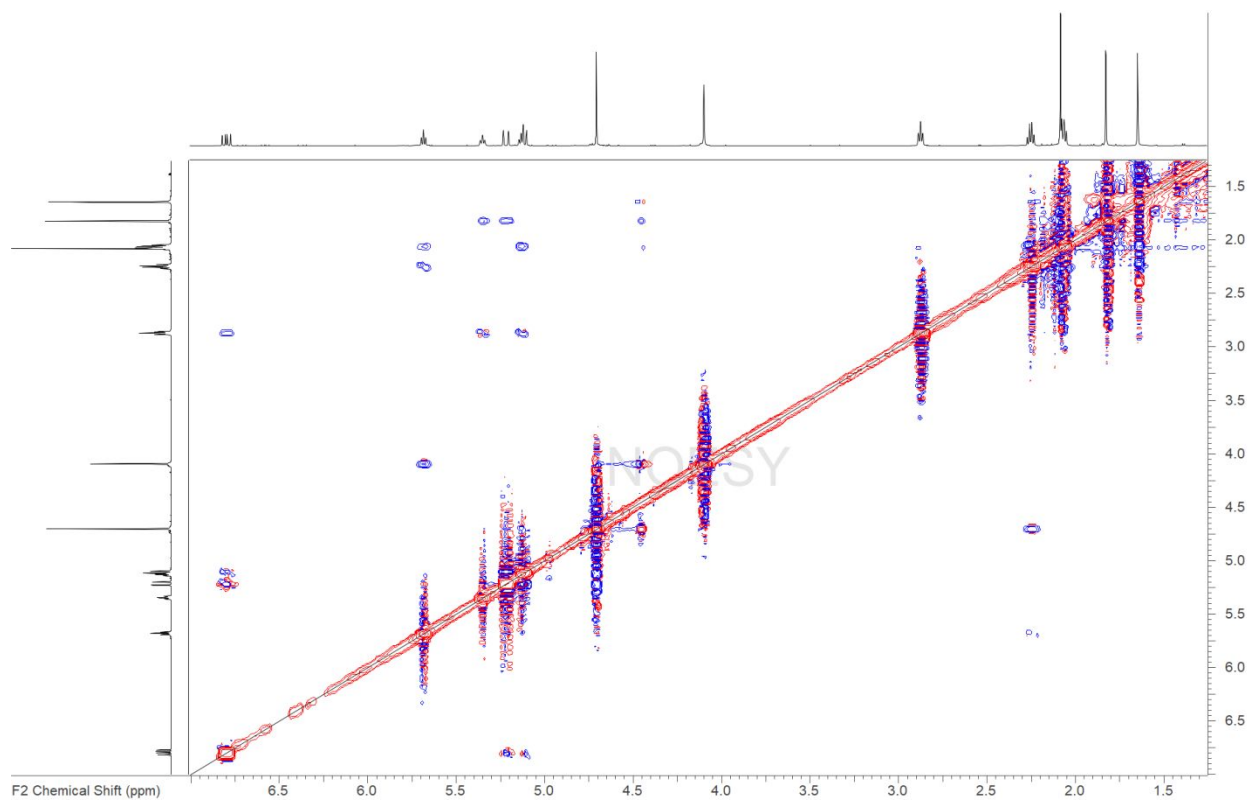

Figure S28: Crannenol C (**3**) NOESY NMR spectrum (500 MHz, CDCl<sub>3</sub>).

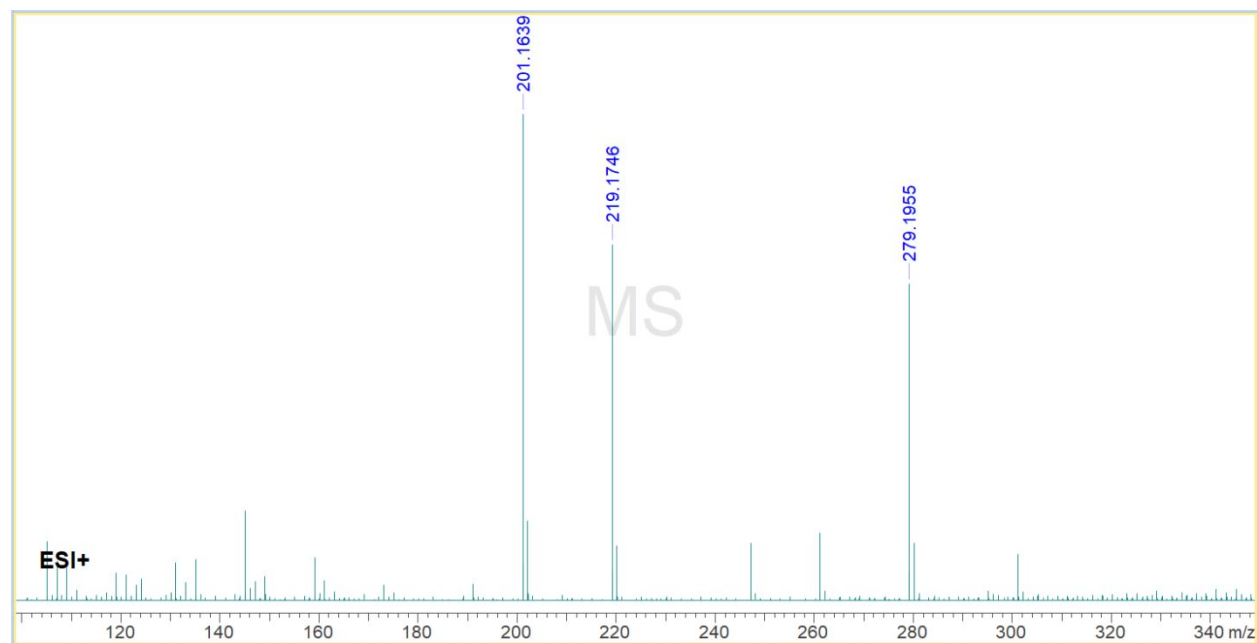

Figure S29: Crannenol C (**3**) HRESIMS.



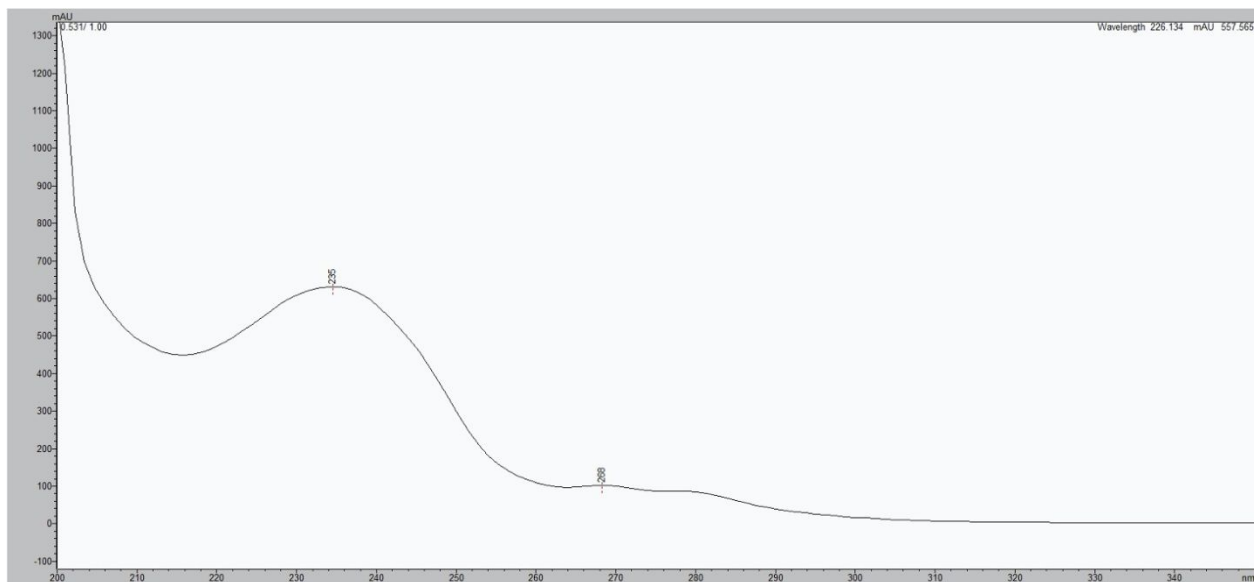

Figure S30: Crannenol C (**3**) UV  $\lambda_{\max}$  (CH<sub>3</sub>OH).

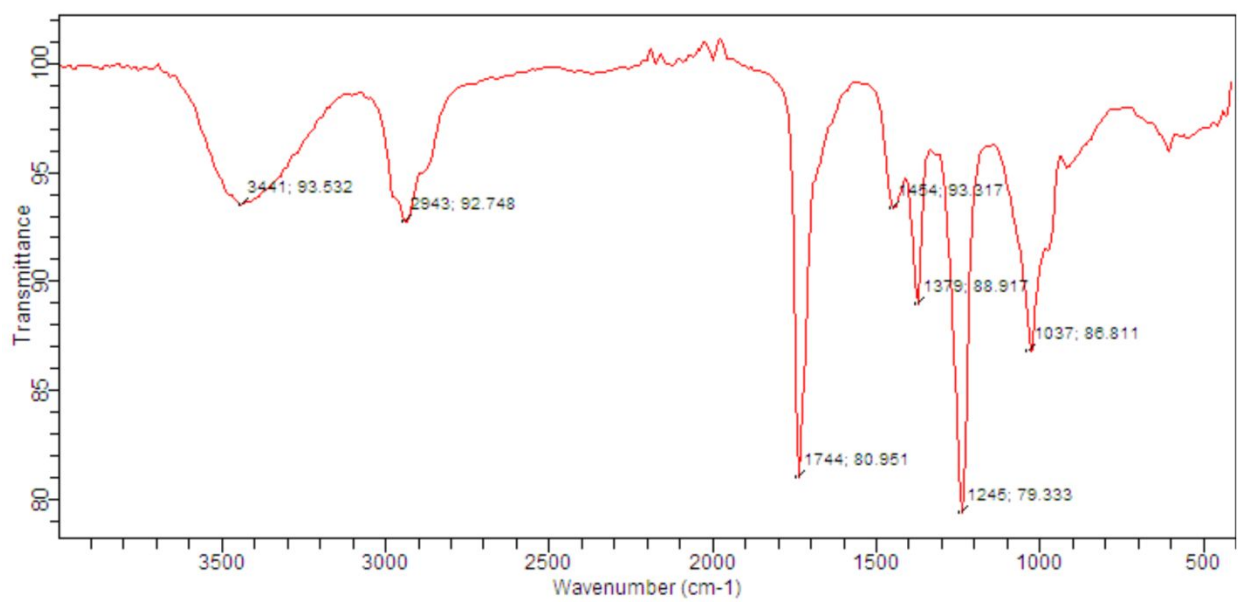

Figure S31: Crannenol C (**3**) IR spectrum (thin film).

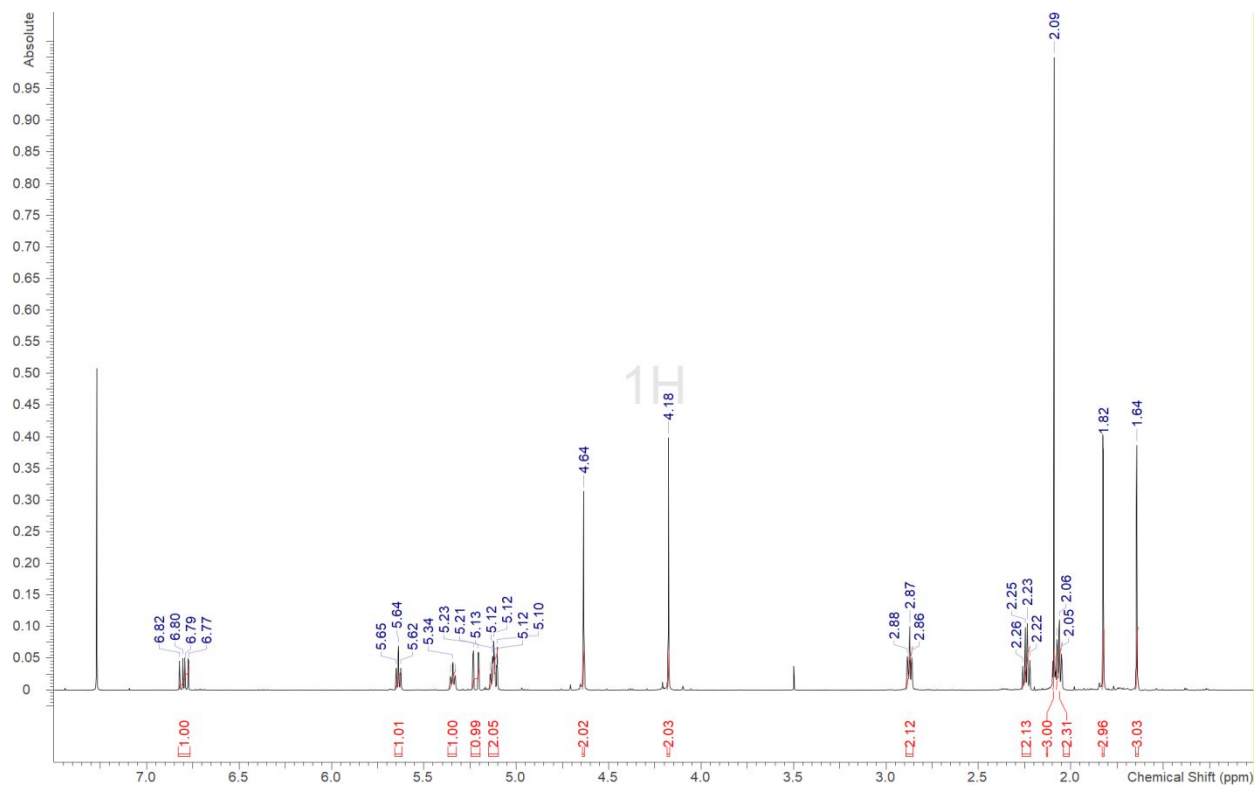

Figure S32: Crannenol D (4)  $^1\text{H}$  NMR spectrum (600 MHz,  $\text{CDCl}_3$ ).

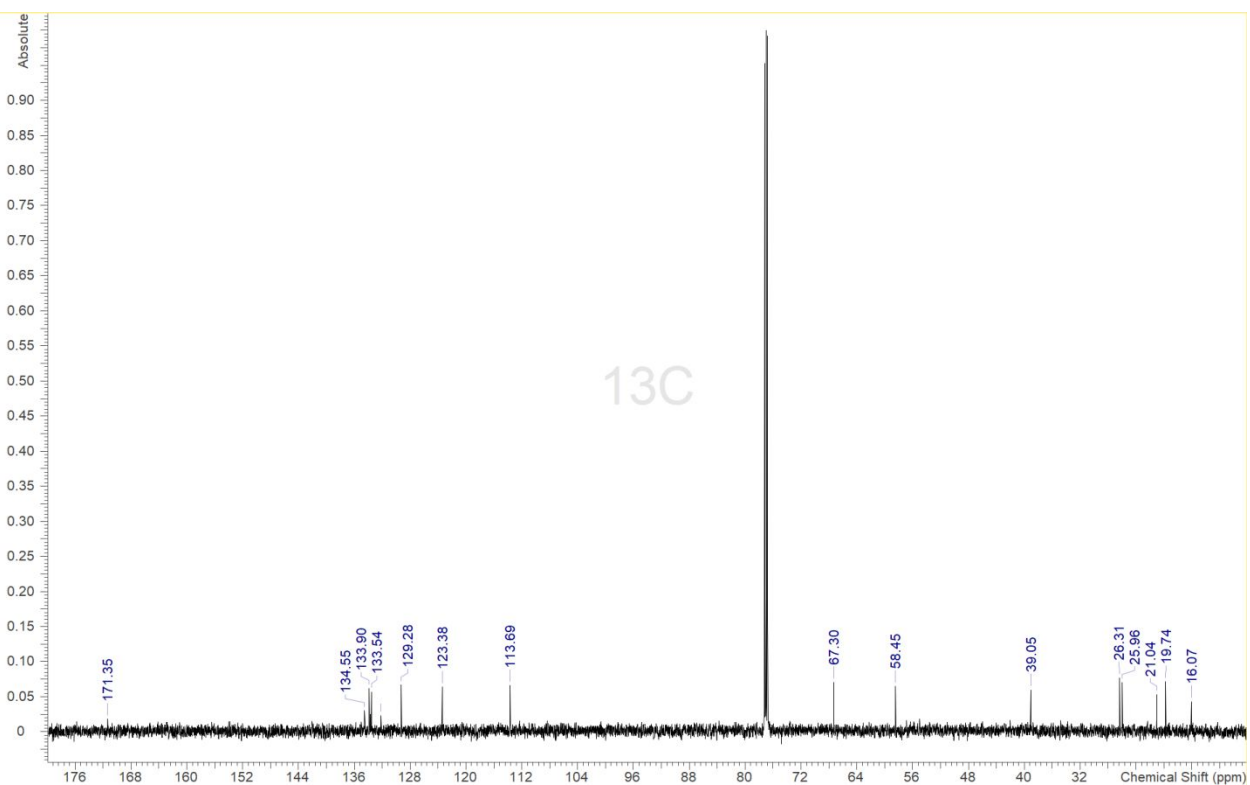

Figure S33: Crannenol D (4)  $^{13}\text{C}$  NMR spectrum (150 MHz,  $\text{CDCl}_3$ ).

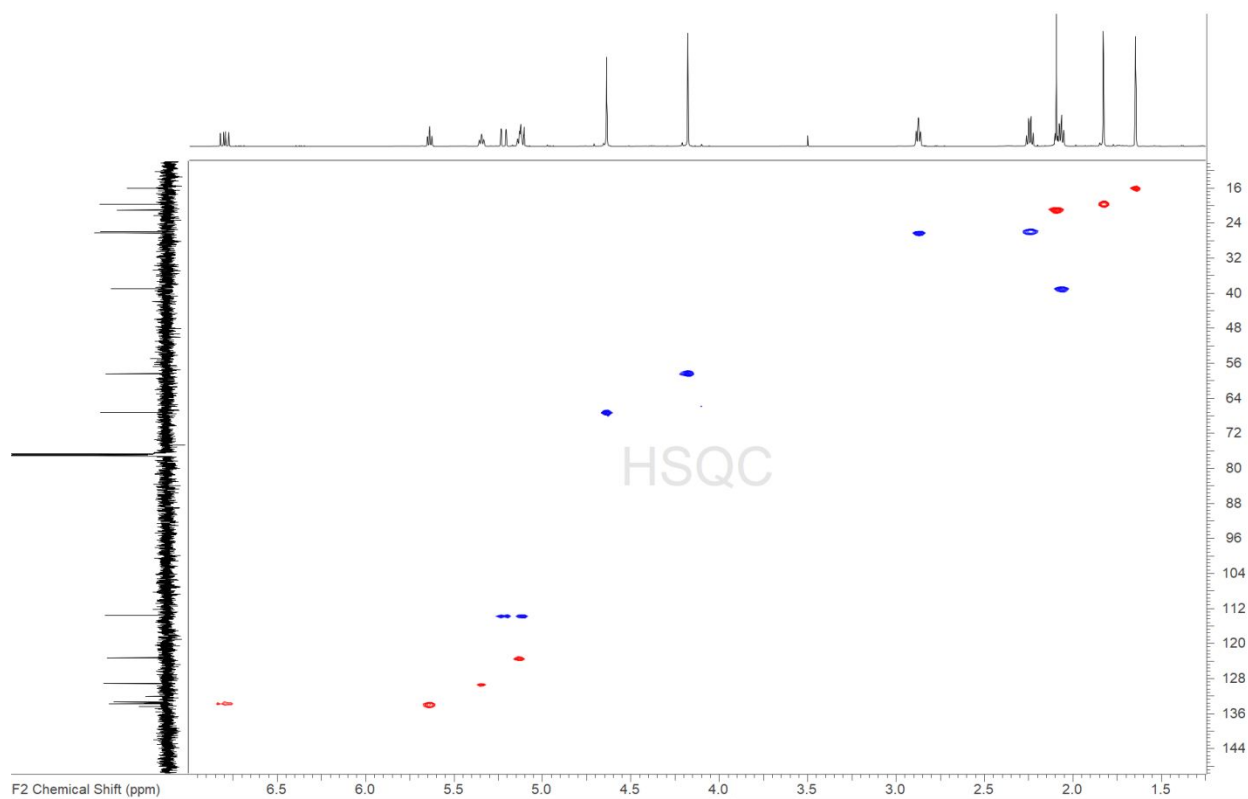

Figure S34: Crannenol D (**4**) HSQC NMR spectrum (500 MHz, CDCl<sub>3</sub>).

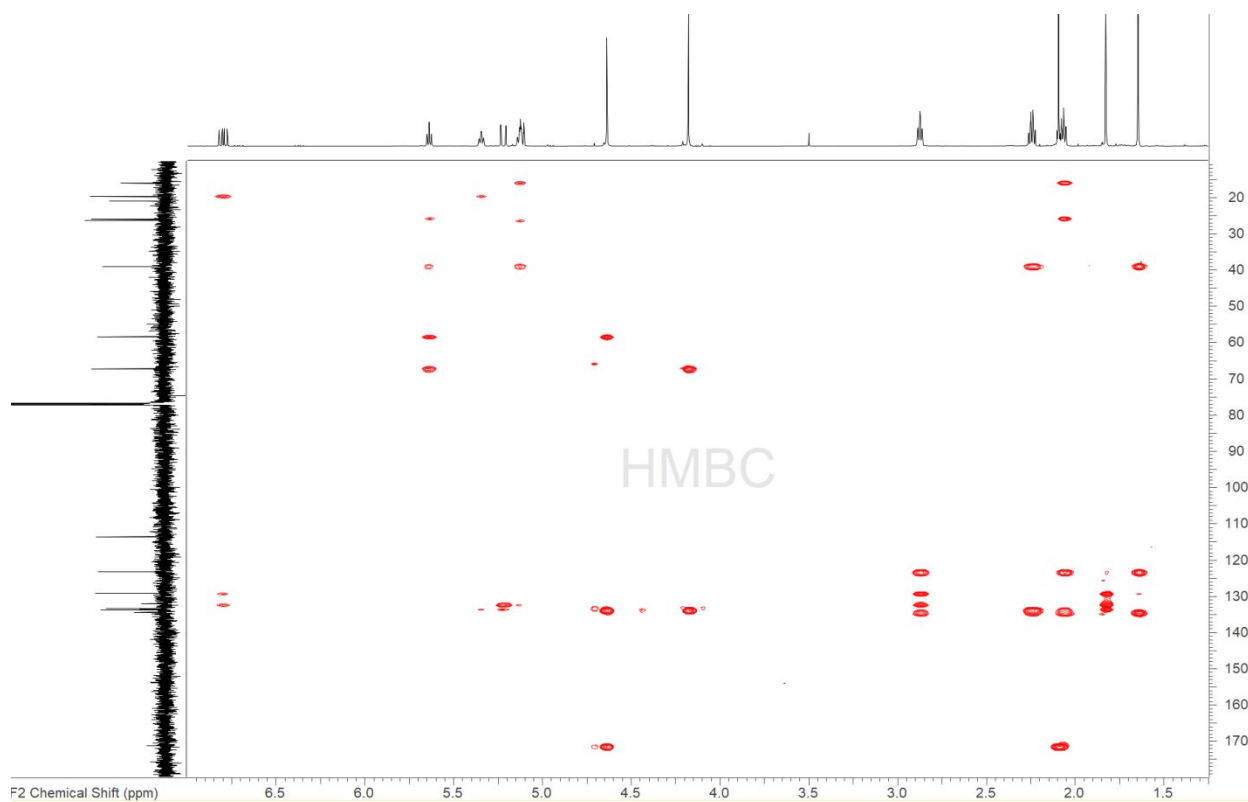

Figure S35: Crannenol D (**4**) HMBC NMR spectrum (500 MHz, CDCl<sub>3</sub>).

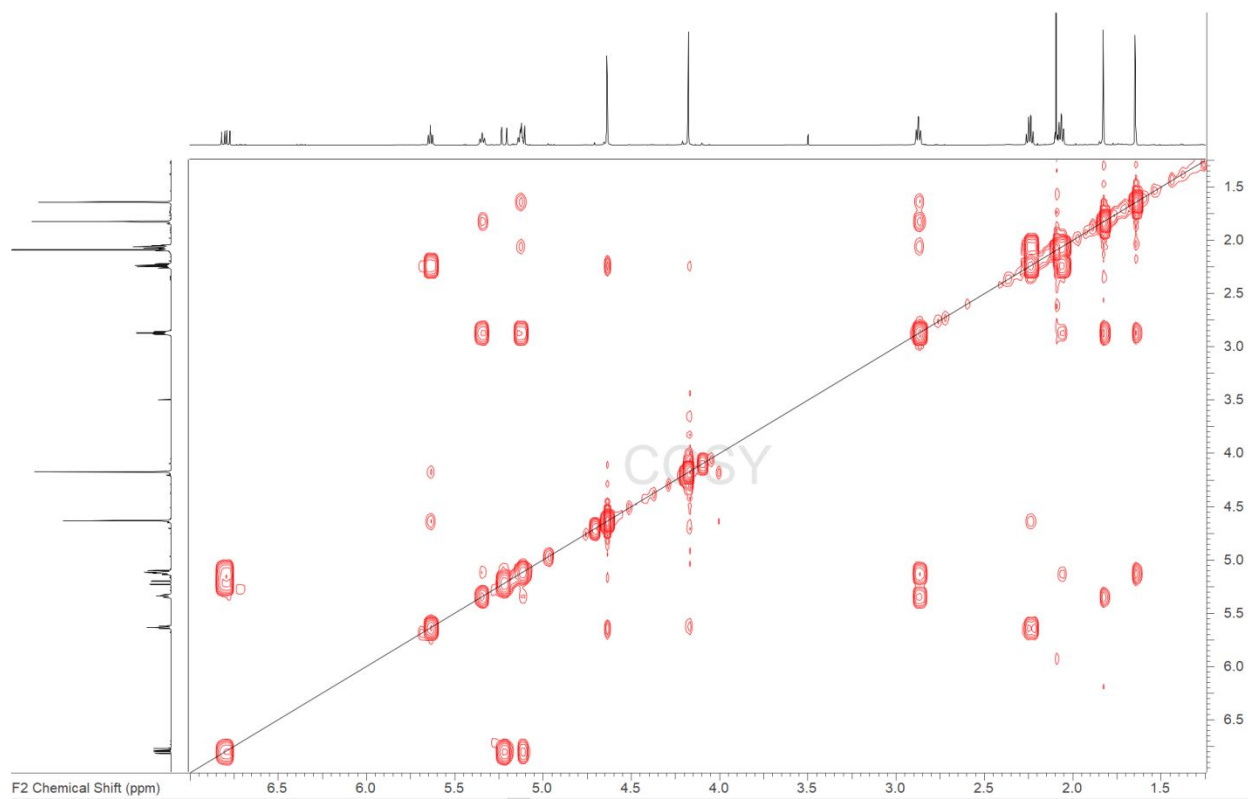

Figure S36: Crannenol D (**4**) COSY NMR spectrum (600 MHz, CDCl<sub>3</sub>).

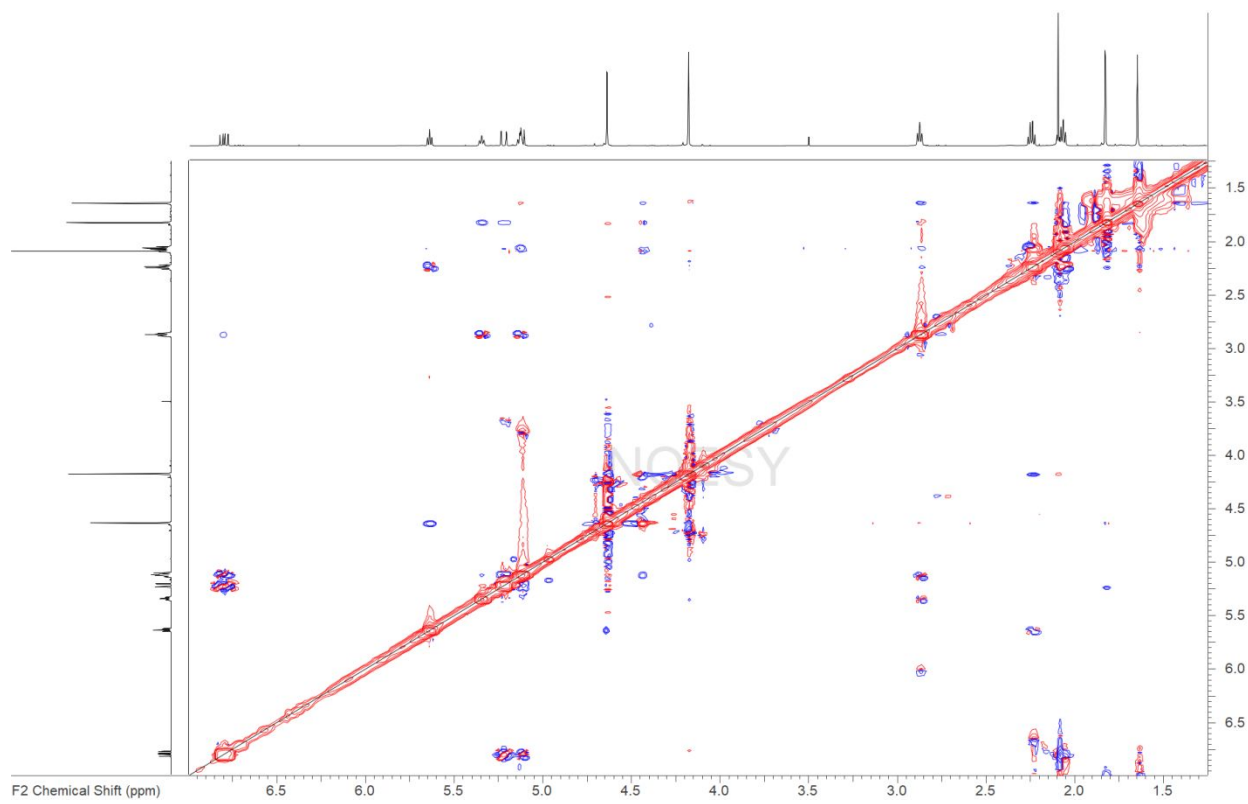

Figure S37: Crannenol D (**4**) NOESY NMR spectrum (500 MHz, CDCl<sub>3</sub>).

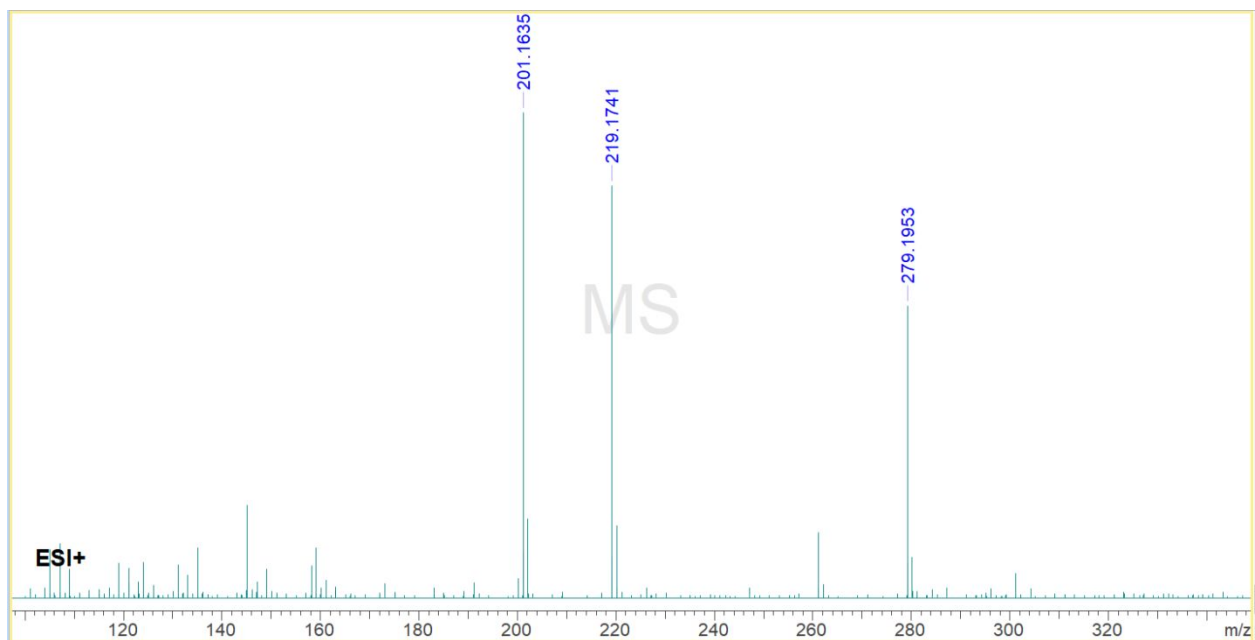

Figure S38: Crannenol D (**4**) HRESIMS.

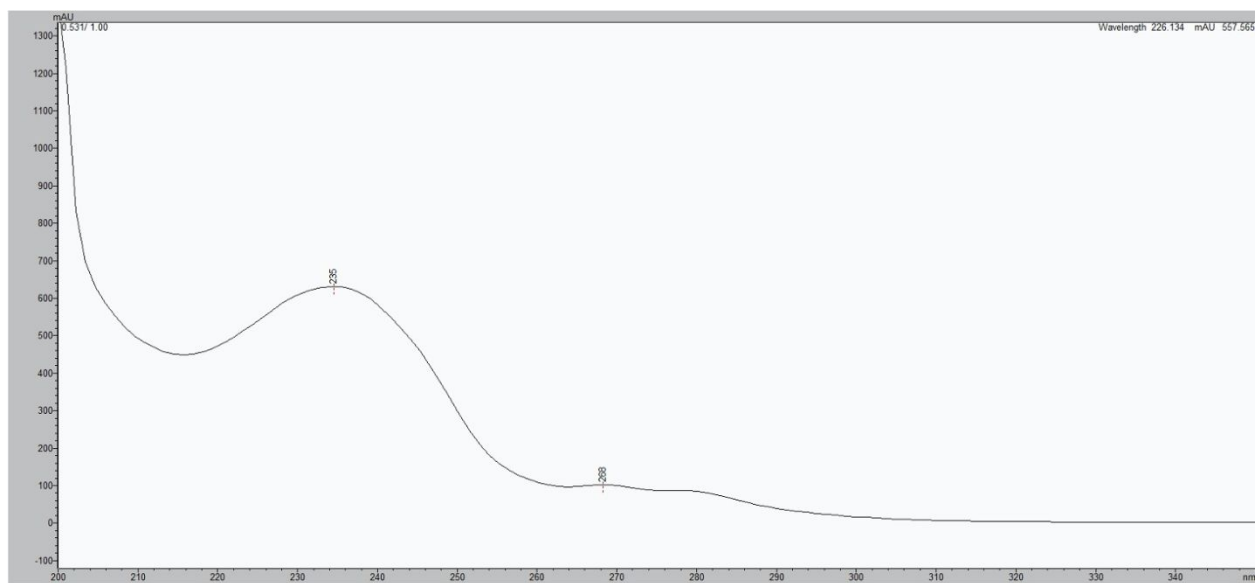

Figure S39: Crannenol D (**4**) UV  $\lambda_{\max}$  (CH<sub>3</sub>OH).

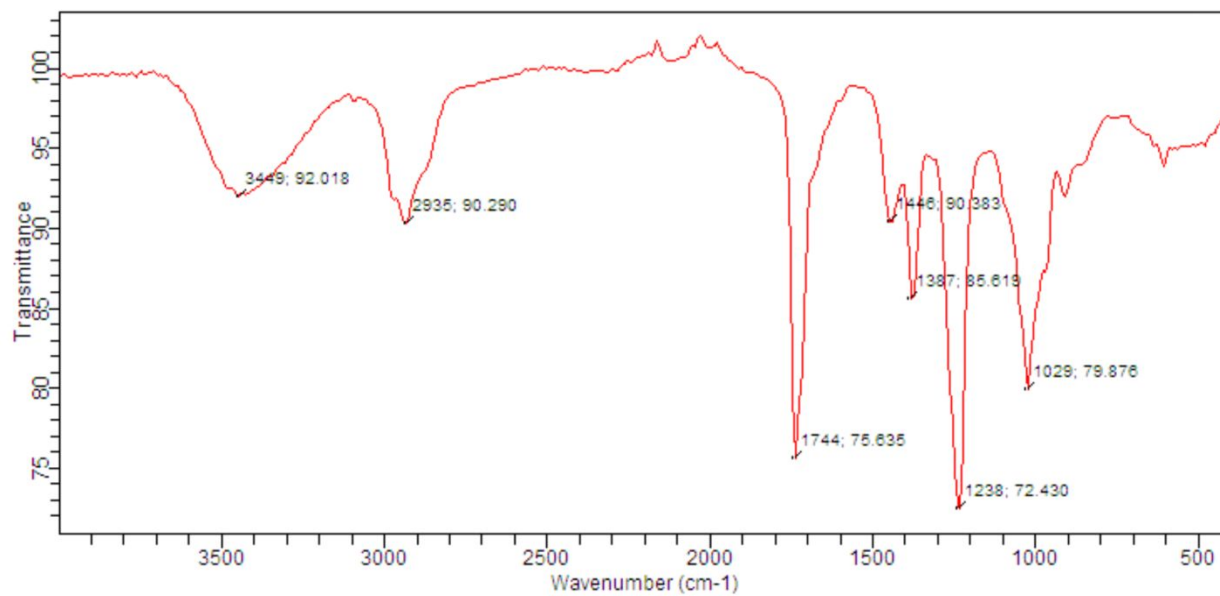

Figure S40: Crannenol D (**4**) IR spectrum (thin film).
